# Supplementary material for: Identification of the Complex Interplay Between Nematode-Related lncRNAs and Their Target Genes in Glycine max L
Source: Front Plant Sci. 2021 Dec 10;12:779597. doi: 10.3389/fpls.2021.779597 (PMC8705754; doi:10.3389/fpls.2021.779597)
Supplement: Supplementary file 1 [file Data_Sheet_1.XLSX]

## Sheet: Table S1
Table S1. Primers used in quantitative real-time PCR to verify transcriptome sequencing data.
Database	Genomic location	StringTie ID or Gene name	Primer sequence	TM	Product Size
SCN	glyma.Wm82.gnm4.Gm10:45001467-45001799	MSTRG.18099.1_F	TACTCAACCCATTCCCCAGT	60	204
	glyma.Wm82.gnm4.Gm10:45001467-45001799	MSTRG.18099.1_R	GATAGGAGCATTCGGTGGAA
SCN	glyma.Wm82.gnm4.Gm10:4739875-4740462	MSTRG.17118.1_F	ACCTTTCTGACGCGAATCAC	60	158
	glyma.Wm82.gnm4.Gm10:4739875-4740462	MSTRG.17118.1_R	CGAGTTTCAGCCACACACAT
SCN	glyma.Wm82.gnm4.Gm07:6312329-6313443	MSTRG.11233.1_F	GTGCGATGCTCTATGACGAA	60	204
	glyma.Wm82.gnm4.Gm07:6312329-6313443	MSTRG.11233.1_R	AGTCGAAACCACCGTACCAC
RAD	glyma.Wm82.gnm4.Gm11:10548870-10549403	MSTRG.20884.1_F	GGGGACAACGTAGATCCAGA	60	244
	glyma.Wm82.gnm4.Gm11:10548870-10549403	MSTRG.20884.1_R	TAGGCAGCAAGTGCAAAGTG
RAD	glyma.Wm82.gnm4.Gm07:28673051-28674736	MSTRG.12578.1_F	TCCCCATCTCGAATCAACTC	60	163
	glyma.Wm82.gnm4.Gm07:28673051-28674736	MSTRG.12578.1_R	GCGATGTCCCGATCAAGTAT
RAD	glyma.Wm82.gnm4.Gm05:32949094-32949650	MSTRG.8304.1_F	GGGCTCATGCACTTTTGAAT	60	177
	glyma.Wm82.gnm4.Gm05:32949094-32949650	MSTRG.8304.1_R	AGATTGGACACTGGGTTTGG
RAD	glyma.Wm82.gnm4.Gm10:51448171-51448605	MSTRG.19778.1_F	TTGCAGTCATGCGTAGAAGG	60	212
	glyma.Wm82.gnm4.Gm10:51448171-51448605	MSTRG.19778.1_R	AATTGGTCCCTCATGACAGC
gma-miR156	glyma.Wm82.gnm4.Gm09:43130199-43132811	MSTRG.17076.2_F	TCAGATCCCTCGGTCATTTC	60	204
	glyma.Wm82.gnm4.Gm09:43130199-43132811	MSTRG.17076.2_R	GAAGCATCTCCCAGTTCAGC
gma-miR319	glyma.Wm82.gnm4.Gm06:47505991-47508698	MSTRG.11150.1_F	CATCACACACCATGATTTCCA	60	242
	glyma.Wm82.gnm4.Gm06:47505991-47508698	MSTRG.11150.1_R	TAGCAAGGGCTTTTGGTGAC
-	-	UKN2	TGTGCTCTGTGAAGAGATTG	60	134
-	-		TCATAATCTGTGTGCAGTTC
-	-	EF1B	CCACTGCTGAAGAAGATGATGATG	60	156
-	-		AAGGACAGAAGACTTGCCACTC

## Sheet: Table S2
Table S2. List of conserved lncRNAs in the SCN dataset which had at least one significant hit in at least one of the non-coding databases
Genomic Location	StringTie ID	CANTATAdb ID	GreeNC ID	PLncDB ID
glyma.Wm82.gnm4.Gm01:7073324-7076005	MSTRG.385.1	CNT2033371	-	-
glyma.Wm82.gnm4.Gm03:37591473-37592403	MSTRG.4386.1	CNT2033282	-	-
glyma.Wm82.gnm4.Gm04:25574549-25575975	MSTRG.6187.1	CNT2034232	-	-
glyma.Wm82.gnm4.Gm04:39317247-39317866	MSTRG.6283.1	CNT2032635	-	-
glyma.Wm82.gnm4.Gm06:8438392-8439572	MSTRG.9385.1	CNT2033710	-	-
glyma.Wm82.gnm4.Gm07:19512631-19519766	MSTRG.11794.1	CNT2032992	-	-
glyma.Wm82.gnm4.Gm07:36827662-36829170	MSTRG.12005.2	CNT20211615	-	-
glyma.Wm82.gnm4.Gm08:1160690-1162810	MSTRG.12648.1	CNT2033352	-	-
glyma.Wm82.gnm4.Gm08:14303138-14303949	MSTRG.13792.1	CNT20129976	-	-
glyma.Wm82.gnm4.Gm09:32860682-32862142	MSTRG.15725.1	CNT2032407	-	-
glyma.Wm82.gnm4.Gm10:11044586-11045432	MSTRG.17313.1	CNT2034536	-	-
glyma.Wm82.gnm4.Gm12:10218070-10220196	MSTRG.21316.1	CNT2032297	-	-
glyma.Wm82.gnm4.Gm12:11713685-11716660	MSTRG.21360.1	CNT2032213	-	-
glyma.Wm82.gnm4.Gm12:35649756-35651625	MSTRG.21658.1	CNT2033246	-	-
glyma.Wm82.gnm4.Gm12:36494160-36495308	MSTRG.21711.1	CNT2034637	-	-
glyma.Wm82.gnm4.Gm13:35735045-35737588	MSTRG.23802.7	CNT2034792	-	-
glyma.Wm82.gnm4.Gm14:21987892-21993591	MSTRG.25481.1	CNT2032666	-	-
glyma.Wm82.gnm4.Gm14:29848520-29849655	MSTRG.25577.1	CNT2034067	-	-
glyma.Wm82.gnm4.Gm14:46917025-46918762	MSTRG.25838.1	CNT2032168	-	-
glyma.Wm82.gnm4.Gm15:4664135-4665208	MSTRG.26486.1	CNT2032565	-	-
glyma.Wm82.gnm4.Gm18:14809294-14809811	MSTRG.31765.1	CNT2034695	-	-
glyma.Wm82.gnm4.Gm18:18532819-18534744	MSTRG.31820.1	CNT2034005	-	-
glyma.Wm82.gnm4.Gm18:1913347-1915343	MSTRG.31218.2	CNT2032202	-	-
glyma.Wm82.gnm4.Gm18:3592942-3593673	MSTRG.31340.1	CNT2034950	-	-
glyma.Wm82.gnm4.Gm19:11847092-11847574	MSTRG.33149.1	CNT2034695	-	-
glyma.Wm82.gnm4.Gm19:9089166-9090665	MSTRG.33125.1	CNT2034755	-	-
glyma.Wm82.gnm4.Gm20:3176410-3181234	MSTRG.34690.1	CNT2034936	-	-
glyma.Wm82.gnm4.Gm20:32139477-32140801	MSTRG.34963.1	CNT2033185	-	-
glyma.Wm82.gnm4.Gm01:3251142-3251928	MSTRG.227.1	-	lcl|Gmax_Glyma.01G031200.1	-
glyma.Wm82.gnm4.Gm01:3253607-3254225	MSTRG.228.1	-	lcl|Gmax_Glyma.01G031200.2	-
glyma.Wm82.gnm4.Gm02:15267518-15273642	MSTRG.2509.1	-	lcl|Gmax_Glyma.10G030300.1	-
glyma.Wm82.gnm4.Gm02:15268987-15273642	MSTRG.2509.2	-	lcl|Gmax_Glyma.10G030300.1	-
glyma.Wm82.gnm4.Gm03:35635874-35637175	MSTRG.4261.1	-	lcl|Gmax_Glyma.19G132100.1	-
glyma.Wm82.gnm4.Gm04:40995791-40996786	MSTRG.6311.1	-	lcl|Gmax_Glyma.04G168000.1	-
glyma.Wm82.gnm4.Gm04:452760-454056	MSTRG.5299.2	-	lcl|Gmax_Glyma.04G005600.1	-
glyma.Wm82.gnm4.Gm05:14055702-14057355	MSTRG.7502.1	-	lcl|Gmax_Glyma.05G088700.1	-
glyma.Wm82.gnm4.Gm06:14444088-14445088	MSTRG.9897.1	-	lcl|Pvulgaris_Phvul.009G168600.1	-
glyma.Wm82.gnm4.Gm06:34353539-34354897	MSTRG.10205.1	-	lcl|Gmax_Glyma.06G229300.2	-
glyma.Wm82.gnm4.Gm06:3647560-3648434	MSTRG.8960.1	-	lcl|Gmax_Glyma.06G048900.1	-
glyma.Wm82.gnm4.Gm09:30123511-30124348	MSTRG.15707.1	-	lcl|Gmax_Glyma.09G121300.1	-
glyma.Wm82.gnm4.Gm09:5673576-5675000	MSTRG.15415.1	-	lcl|Gmax_Glyma.09G060800.1	-
glyma.Wm82.gnm4.Gm10:47816134-47817867	MSTRG.18338.1	-	lcl|Gmax_Glyma.10G249200.1	-
glyma.Wm82.gnm4.Gm10:51448170-51449906	MSTRG.18680.1	-	lcl|Gmax_Glyma.10G297000.1	-
glyma.Wm82.gnm4.Gm11:10155377-10156140	MSTRG.19670.1	-	lcl|Gmax_Glyma.11G133100.1	-
glyma.Wm82.gnm4.Gm11:19497545-19500596	MSTRG.20057.1	-	lcl|Gmax_Glyma.11G157900.1	-
glyma.Wm82.gnm4.Gm11:5106173-5109459	MSTRG.19190.1	-	lcl|Gmax_Glyma.01G175700.9	-
glyma.Wm82.gnm4.Gm12:8443484-8445316	MSTRG.21253.2	-	lcl|Gmax_Glyma.12G098300.1	-
glyma.Wm82.gnm4.Gm13:31126168-31131495	MSTRG.23384.1	-	lcl|Gmax_Glyma.13G203200.1	-
glyma.Wm82.gnm4.Gm14:38070473-38071172	MSTRG.25649.1	-	lcl|Gmax_Glyma.14G160400.1	-
glyma.Wm82.gnm4.Gm14:45715912-45719521	MSTRG.25773.1	-	lcl|Gmax_Glyma.14G184800.1	-
glyma.Wm82.gnm4.Gm14:5949365-5950774	MSTRG.25112.1	-	lcl|Gmax_Glyma.14G072000.1	-
glyma.Wm82.gnm4.Gm15:24399624-24403980	MSTRG.27347.1	-	lcl|Gmax_Glyma.15G199200.1	-
glyma.Wm82.gnm4.Gm15:398072-400847	MSTRG.26076.1	-	lcl|Gmax_Glyma.15G004400.1	-
glyma.Wm82.gnm4.Gm15:45611751-45612476	MSTRG.27540.1	-	lcl|Gmax_Glyma.15G238100.1	-
glyma.Wm82.gnm4.Gm15:4847068-4849372	MSTRG.26509.1	-	lcl|Gmax_Glyma.15G063700.1	-
glyma.Wm82.gnm4.Gm15:8229007-8229975	MSTRG.26787.1	-	lcl|Pvulgaris_Phvul.006G152200.1	-
glyma.Wm82.gnm4.Gm16:11016433-11017649	MSTRG.28389.1	-	lcl|Gmax_Glyma.16G087800.1	-
glyma.Wm82.gnm4.Gm16:7109216-7110651	MSTRG.28299.1	-	lcl|Gmax_Glyma.16G071600.1	-
glyma.Wm82.gnm4.Gm16:7109301-7110651	MSTRG.28299.3	-	lcl|Gmax_Glyma.16G071600.1	-
glyma.Wm82.gnm4.Gm17:27172293-27176358	MSTRG.30558.1	-	lcl|Gmax_Glyma.17G191800.1	-
glyma.Wm82.gnm4.Gm17:9805498-9808097	MSTRG.30110.1	-	lcl|Gmax_Glyma.17G123000.1	-
glyma.Wm82.gnm4.Gm18:19295068-19298158	MSTRG.31835.1	-	lcl|Gmax_Glyma.08G290000.1	-
glyma.Wm82.gnm4.Gm18:38660627-38661206	MSTRG.31981.1	-	lcl|Gmax_Glyma.18G166500.1	-
glyma.Wm82.gnm4.Gm18:58039871-58041977	MSTRG.32806.1	-	lcl|Gmax_Glyma.18G300000.1	-
glyma.Wm82.gnm4.Gm18:7147636-7151088	MSTRG.31546.1	-	lcl|Gmax_Glyma.18G075900.1	-
glyma.Wm82.gnm4.Gm18:7410227-7412785	MSTRG.31561.1	-	lcl|Gmax_Glyma.18G078100.1	-
glyma.Wm82.gnm4.Gm19:1817031-1819242	MSTRG.32938.1	-	lcl|Gmax_Glyma.19G017600.1	-
glyma.Wm82.gnm4.Gm19:39442480-39447272	MSTRG.33543.1	-	lcl|Gmax_Glyma.19G130300.1	-
glyma.Wm82.gnm4.Gm20:36438626-36443184	MSTRG.35210.1	-	lcl|Gmax_Glyma.10G269100.1	-
glyma.Wm82.gnm4.scaffold_27:93634-97390	MSTRG.36168.1	-	lcl|Gmax_Glyma.03G046200.1	-
glyma.Wm82.gnm4.scaffold_69:101360-102746	MSTRG.36212.1	-	lcl|Gmax_Glyma.07G064200.1	-
glyma.Wm82.gnm4.scaffold_69:12207-14333	MSTRG.36200.1	-	lcl|Gmax_Glyma.07G063200.1	-
glyma.Wm82.gnm4.scaffold_69:34419-36504	MSTRG.36205.1	-	lcl|Gmax_Glyma.07G063200.1	-
glyma.Wm82.gnm4.scaffold_69:85015-88013	MSTRG.36209.1	-	lcl|Gmax_Glyma.07G063200.1	-
glyma.Wm82.gnm4.Gm01:54599861-54600356	MSTRG.1232.1	-	-	GMAX_LNC000224.1
glyma.Wm82.gnm4.Gm01:54735977-54739634	MSTRG.1244.1	-	-	GMAX_LNC000005.1
glyma.Wm82.gnm4.Gm01:713444-714000	MSTRG.53.1	-	-	VRAD_LNC004451.3
glyma.Wm82.gnm4.Gm02:46816331-46817184	MSTRG.3231.1	-	-	VRAD_LNC004451.3
glyma.Wm82.gnm4.Gm02:46820852-46821669	MSTRG.3232.1	-	-	GMAX_LNC000285.1
glyma.Wm82.gnm4.Gm02:5280298-5281921	MSTRG.1973.1	-	-	GMAX_LNC000884.1
glyma.Wm82.gnm4.Gm04:45648645-45649340	MSTRG.6492.1	-	-	GMAX_LNC001189.1
glyma.Wm82.gnm4.Gm04:7623231-7623979	MSTRG.5892.1	-	-	GMAX_LNC004074.1
glyma.Wm82.gnm4.Gm05:1623635-1626402	MSTRG.7077.1	-	-	GMAX_LNC001130.1
glyma.Wm82.gnm4.Gm05:40617439-40618275	MSTRG.8455.1	-	-	GMAX_LNC001273.1
glyma.Wm82.gnm4.Gm06:23579746-23581003	MSTRG.10153.1	-	-	GMAX_LNC001294.1
glyma.Wm82.gnm4.Gm06:35830009-35832655	MSTRG.10217.1	-	-	GMAX_LNC001487.1
glyma.Wm82.gnm4.Gm07:16032891-16036318	MSTRG.11659.1	-	-	GMAX_LNC001513.1
glyma.Wm82.gnm4.Gm07:21169952-21170813	MSTRG.11812.1	-	-	GMAX_LNC001565.1
glyma.Wm82.gnm4.Gm07:37689193-37690064	MSTRG.12060.1	-	-	GMAX_LNC001433.1
glyma.Wm82.gnm4.Gm07:6312329-6313443	MSTRG.11233.1	-	-	LANG_LNC002624.1
glyma.Wm82.gnm4.Gm07:7054358-7057248	MSTRG.11293.4	-	-	GMAX_LNC001446.2
glyma.Wm82.gnm4.Gm07:8081841-8084128	MSTRG.11361.1	-	-	GMAX_LNC001454.1
glyma.Wm82.gnm4.Gm07:9016617-9017934	MSTRG.11422.1	-	-	VRAD_LNC004108.3
glyma.Wm82.gnm4.Gm08:13800611-13802572	MSTRG.13747.1	-	-	VRAD_LNC004108.3
glyma.Wm82.gnm4.Gm08:13800622-13802572	MSTRG.13747.2	-	-	GMAX_LNC001914.1
glyma.Wm82.gnm4.Gm09:3538040-3538687	MSTRG.15299.1	-	-	GMAX_LNC002064.1
glyma.Wm82.gnm4.Gm09:44075231-44076741	MSTRG.16200.1	-	-	GMAX_LNC002293.1
glyma.Wm82.gnm4.Gm10:41747046-41747997	MSTRG.17868.1	-	-	OEUR_LNC010280.1
glyma.Wm82.gnm4.Gm10:45001467-45001799	MSTRG.18099.1	-	-	GMAX_LNC002334.6
glyma.Wm82.gnm4.Gm10:45770959-45772286	MSTRG.18163.1	-	-	GMAX_LNC002147.1
glyma.Wm82.gnm4.Gm10:4739875-4740462	MSTRG.17118.1	-	-	GMAX_LNC002357.1
glyma.Wm82.gnm4.Gm10:49226849-49227650	MSTRG.18476.1	-	-	GMAX_LNC002372.1
glyma.Wm82.gnm4.Gm10:51244801-51245665	MSTRG.18662.1	-	-	GMAX_LNC002521.1
glyma.Wm82.gnm4.Gm11:32636138-32636790	MSTRG.20167.1	-	-	GMAX_LNC002395.1
glyma.Wm82.gnm4.Gm11:3590019-3591839	MSTRG.19048.1	-	-	GMAX_LNC002734.1
glyma.Wm82.gnm4.Gm12:38971845-38973363	MSTRG.21896.1	-	-	GMAX_LNC002856.1
glyma.Wm82.gnm4.Gm13:17752856-17756596	MSTRG.22491.1	-	-	GMAX_LNC002878.1
glyma.Wm82.gnm4.Gm13:20939087-20939952	MSTRG.22658.1	-	-	GMAX_LNC003758.1
glyma.Wm82.gnm4.Gm13:27895103-27896126	MSTRG.23165.1	-	-	GMAX_LNC002965.2
glyma.Wm82.gnm4.Gm13:31764711-31765580	MSTRG.23428.1	-	-	GMAX_LNC002965.3
glyma.Wm82.gnm4.Gm13:31767356-31768395	MSTRG.23429.1	-	-	GMAX_LNC000383.1
glyma.Wm82.gnm4.Gm13:7625888-7626447	MSTRG.22162.1	-	-	GMAX_LNC003184.1
glyma.Wm82.gnm4.Gm14:32530024-32530760	MSTRG.25611.1	-	-	GMAX_LNC003316.1
glyma.Wm82.gnm4.Gm15:1582808-1584343	MSTRG.26190.1	-	-	GBAR_LNC005734.1
glyma.Wm82.gnm4.Gm15:7030547-7031240	MSTRG.26687.1	-	-	GMAX_LNC003972.1
glyma.Wm82.gnm4.Gm17:36452173-36455533	MSTRG.30684.1	-	-	GMAX_LNC000427.1
glyma.Wm82.gnm4.Gm17:5881103-5882500	MSTRG.29759.1	-	-	GMAX_LNC004120.1
glyma.Wm82.gnm4.Gm18:19585413-19586554	MSTRG.31842.1	-	-	GMAX_LNC004262.1
glyma.Wm82.gnm4.Gm18:58003862-58004290	MSTRG.32805.1	-	-	GMAX_LNC004393.1
glyma.Wm82.gnm4.Gm19:39162754-39163855	MSTRG.33524.1	-	-	GMAX_LNC004429.2
glyma.Wm82.gnm4.Gm19:42912871-42913576	MSTRG.33792.1	-	-	GMAX_LNC004626.1
glyma.Wm82.gnm4.Gm20:40256250-40257158	MSTRG.35526.1	-	-	GMAX_LNC004628.1
glyma.Wm82.gnm4.Gm20:40477638-40478617	MSTRG.35537.1	-	-	GMAX_LNC004642.1
glyma.Wm82.gnm4.Gm20:43016761-43017943	MSTRG.35717.1	-	-	PTRI_LNC002721.1
glyma.Wm82.gnm4.scaffold_113:51164-60887	MSTRG.36125.1	-	-	GMAX_LNC000522.1
glyma.Wm82.gnm4.scaffold_521:7120-7882	MSTRG.36195.1	-	-
glyma.Wm82.gnm4.Gm01:44919462-44926001	MSTRG.728.1	CNT2032486	lcl|Gmax_Glyma.02G162800.1	GMAX_LNC004739.2
glyma.Wm82.gnm4.Gm02:2659746-2660912	MSTRG.1778.1	CNT20209072	lcl|Pvulgaris_Phvul.002G076100.1	GMAX_LNC000021.1
glyma.Wm82.gnm4.Gm02:31837062-31841095	MSTRG.2701.1	CNT2034892	lcl|Gmax_Glyma.19G045000.1	GMAX_LNC002657.2
glyma.Wm82.gnm4.Gm04:48403203-48406779	MSTRG.6699.1	CNT2032670	lcl|Gmax_Glyma.04G226000.1	LUSI_LNC003359.4
glyma.Wm82.gnm4.Gm04:48403209-48406779	MSTRG.6699.2	CNT2032670	lcl|Gmax_Glyma.04G226000.1	LUSI_LNC003359.4
glyma.Wm82.gnm4.Gm05:34315136-34323103	MSTRG.7889.3	CNT2032700	lcl|Gmax_Glyma.U038400.2	GMAX_LNC000069.1
glyma.Wm82.gnm4.Gm06:4542086-4545967	MSTRG.9041.1	CNT2035092	lcl|Gmax_Glyma.04G011500.2	GMAX_LNC001975.1
glyma.Wm82.gnm4.Gm06:50941232-50945864	MSTRG.10716.5	CNT2034253	lcl|Gmax_Glyma.U022700.1	GMAX_LNC000086.1
glyma.Wm82.gnm4.Gm11:39616523-39619967	MSTRG.20564.1	CNT2032889	lcl|Gmax_Glyma.06G325400.1	GMAX_LNC001887.1
glyma.Wm82.gnm4.Gm14:12518318-12522958	MSTRG.25376.1	CNT2032112	lcl|Gmax_Glyma.06G075400.1	GMAX_LNC003536.1
glyma.Wm82.gnm4.Gm17:35661114-35662524	MSTRG.30666.1	CNT2032061	lcl|Gmax_Glyma.07G163000.1	GMAX_LNC004066.1
glyma.Wm82.gnm4.Gm07:9891546-9897310	MSTRG.11470.1	CNT2033094	lcl|Gmax_Glyma.14G114600.1	-
glyma.Wm82.gnm4.Gm11:916288-918461	MSTRG.18793.1	CNT2033859	lcl|Gmax_Glyma.11G013200.2	-
glyma.Wm82.gnm4.Gm14:42578831-42579933	MSTRG.25688.1	CNT2032057	lcl|Gmax_Glyma.14G168400.1	-
glyma.Wm82.gnm4.Gm18:15233115-15237592	MSTRG.31776.2	CNT2033639	lcl|Gmax_Glyma.04G113800.1	-
glyma.Wm82.gnm4.Gm20:163874-166641	MSTRG.34541.1	CNT2032031	lcl|Gmax_Glyma.20G001500.1	-
glyma.Wm82.gnm4.Gm20:19229357-19234642	MSTRG.34838.1	CNT2032717	lcl|Gmax_Glyma.20G061900.1	-
glyma.Wm82.gnm4.Gm20:21666256-21667421	MSTRG.34852.1	CNT2032627	lcl|Gmax_Glyma.20G064300.1	-
glyma.Wm82.gnm4.Gm20:46857507-46858665	MSTRG.36021.1	CNT2033532	lcl|Gmax_Glyma.20G237100.1	-
glyma.Wm82.gnm4.scaffold_69:77636-78339	MSTRG.36208.1	CNT2034372	lcl|Gmax_Glyma.07G063900.1	-
glyma.Wm82.gnm4.Gm02:35793405-35794161	MSTRG.2737.1	CNT2033879	-	GMAX_LNC000410.1
glyma.Wm82.gnm4.Gm04:21988173-21991278	MSTRG.6170.1	CNT2034746	-	GMAX_LNC004129.1
glyma.Wm82.gnm4.Gm05:7110564-7116785	MSTRG.7433.1	CNT2033347	-	GMAX_LNC000335.1
glyma.Wm82.gnm4.Gm09:3915879-3916765	MSTRG.15329.1	CNT20211478	-	GMAX_LNC001917.1
glyma.Wm82.gnm4.Gm10:10193133-10195200	MSTRG.17301.1	CNT2035097	-	GMAX_LNC003954.1
glyma.Wm82.gnm4.Gm10:43428229-43430822	MSTRG.17989.9	CNT2034073	-	GMAX_LNC002311.4
glyma.Wm82.gnm4.Gm10:46125209-46127257	MSTRG.18196.1	CNT2032938	-	GMAX_LNC002699.1
glyma.Wm82.gnm4.Gm12:12456976-12458398	MSTRG.21370.1	CNT2032402	-	GMAX_LNC002633.1
glyma.Wm82.gnm4.Gm12:37980546-37982065	MSTRG.21819.2	CNT2033936	-	GMAX_LNC002726.2
glyma.Wm82.gnm4.Gm14:42953090-42956417	MSTRG.25693.1	CNT2033621	-	GMAX_LNC000373.1
glyma.Wm82.gnm4.Gm14:9814645-9816210	MSTRG.25326.1	CNT2032733	-	GMAX_LNC003977.1
glyma.Wm82.gnm4.Gm15:24397846-24399198	MSTRG.27346.1	CNT2033143	-	GMAX_LNC000843.1
glyma.Wm82.gnm4.Gm15:50414669-50416567	MSTRG.27633.1	CNT20209716	-	VRAD_LNC004108.3
glyma.Wm82.gnm4.Gm15:50414960-50416567	MSTRG.27633.2	CNT20209716	-	VRAD_LNC004108.3
glyma.Wm82.gnm4.Gm16:4974584-4976496	MSTRG.28169.1	CNT2034573	-	PVUL_LNC004968.4
glyma.Wm82.gnm4.Gm17:19897391-19902956	MSTRG.30501.1	CNT2034360	-	GMAX_LNC003920.1
glyma.Wm82.gnm4.Gm17:22364801-22367282	MSTRG.30513.1	CNT2033560	-	GMAX_LNC003928.1
glyma.Wm82.gnm4.Gm17:27527410-27528874	MSTRG.30564.1	CNT2033347	-	GMAX_LNC000335.1
glyma.Wm82.gnm4.Gm17:34243396-34249289	MSTRG.30640.1	CNT2033560	-	GMAX_LNC003928.1
glyma.Wm82.gnm4.Gm18:18627822-18628728	MSTRG.31826.1	CNT2032442	-	GMAX_LNC004118.1
glyma.Wm82.gnm4.Gm18:8309575-8310798	MSTRG.31585.1	CNT2032387	-	GMAX_LNC001311.1
glyma.Wm82.gnm4.Gm19:28094428-28096793	MSTRG.33217.2	CNT2033272	-	GMAX_LNC004349.5
glyma.Wm82.gnm4.Gm19:28094437-28096793	MSTRG.33217.3	CNT2033272	-	GMAX_LNC004349.5
glyma.Wm82.gnm4.Gm20:4668441-4669198	MSTRG.34716.1	CNT2033211	-	GMAX_LNC004514.1
glyma.Wm82.gnm4.scaffold_69:15711-17932	MSTRG.36201.1	CNT2032287	-	GMAX_LNC001425.1
glyma.Wm82.gnm4.scaffold_69:88959-91373	MSTRG.36210.1	CNT2032287	-	GMAX_LNC001425.1
glyma.Wm82.gnm4.Gm01:54931081-54932110	MSTRG.1270.1	-	lcl|Gmax_Glyma.01G205800.1	GMAX_LNC000226.1
glyma.Wm82.gnm4.Gm02:43813719-43815699	MSTRG.3007.1	-	lcl|Gmax_Glyma.03G132500.1	GMAX_LNC000450.1
glyma.Wm82.gnm4.Gm03:45728580-45729556	MSTRG.5135.1	-	lcl|Gmax_Glyma.03G249400.1	GMAX_LNC000704.1
glyma.Wm82.gnm4.Gm05:36472428-36473081	MSTRG.8073.1	-	lcl|Gmax_Glyma.08G132900.1	GMAX_LNC001107.1
glyma.Wm82.gnm4.Gm08:41793822-41795257	MSTRG.14592.1	-	lcl|Gmax_Glyma.08G305700.1	GMAX_LNC001844.1
glyma.Wm82.gnm4.Gm09:13290634-13294256	MSTRG.15581.1	-	lcl|Gmax_Glyma.19G045000.1	GMAX_LNC004339.1
glyma.Wm82.gnm4.Gm09:5056580-5058173	MSTRG.15382.1	-	lcl|Gmax_Glyma.02G074400.1	GMAX_LNC001934.1
glyma.Wm82.gnm4.Gm10:44916983-44918921	MSTRG.18092.1	-	lcl|Gmax_Glyma.10G216800.1	GMAX_LNC001767.1
glyma.Wm82.gnm4.Gm10:44917063-44918921	MSTRG.18092.2	-	lcl|Gmax_Glyma.10G216800.1	GMAX_LNC001767.1
glyma.Wm82.gnm4.Gm10:51442991-51443893	MSTRG.18679.1	-	lcl|Gmax_Glyma.20G247800.1	VRAD_LNC009420.8
glyma.Wm82.gnm4.Gm13:28957952-28958976	MSTRG.23249.1	-	lcl|Gmax_Glyma.03G064500.1	GMAX_LNC002958.1
glyma.Wm82.gnm4.Gm15:4409359-4416640	MSTRG.26464.1	-	lcl|Gmax_Glyma.15G057400.1	GMAX_LNC003002.4
glyma.Wm82.gnm4.Gm15:6019284-6023945	MSTRG.26615.1	-	lcl|Gmax_Glyma.15G078500.1	GMAX_LNC003356.1
glyma.Wm82.gnm4.Gm19:37454502-37455944	MSTRG.33428.2	-	lcl|Gmax_Glyma.19G114700.1	VRAD_LNC017995.1
glyma.Wm82.gnm4.Gm20:37399520-37400490	MSTRG.35306.1	-	lcl|Gmax_Glyma.20G134300.1	GMAX_LNC004609.1
glyma.Wm82.gnm4.Gm20:46030211-46031244	MSTRG.35950.1	-	lcl|Gmax_Glyma.10G164400.1	GMAX_LNC004673.1

## Sheet: Table S3
Table S3. List of conserved lncRNAs in RAD which had at least one significant hit in at least one of the non-coding databases
Genomic Location	StringTie ID	CANTATAdb ID	GreeNC ID	PLncDB ID
glyma.Wm82.gnm4.Gm02:45330806-45332415	MSTRG.3363.3	CNT2032787	-
glyma.Wm82.gnm4.Gm03:26519558-26522323	MSTRG.4317.1	CNT2033690	-
glyma.Wm82.gnm4.Gm03:37711706-37712687	MSTRG.4710.1	CNT2032969	-
glyma.Wm82.gnm4.Gm04:25574825-25575975	MSTRG.6596.1	CNT2034232	-
glyma.Wm82.gnm4.Gm06:47452418-47452966	MSTRG.11145.1	CNT2032233	-
glyma.Wm82.gnm4.Gm07:18532938-18533577	MSTRG.12489.1	CNT2034320	-
glyma.Wm82.gnm4.Gm07:19512632-19517820	MSTRG.12521.1	CNT2032992	-
glyma.Wm82.gnm4.Gm08:14303212-14303973	MSTRG.14634.1	CNT20129976	-
glyma.Wm82.gnm4.Gm10:30196824-30197594	MSTRG.18489.1	CNT2032281	-
glyma.Wm82.gnm4.Gm10:33397259-33397803	MSTRG.18520.1	CNT2032939	-
glyma.Wm82.gnm4.Gm11:917746-918523	MSTRG.19903.1	CNT2033859	-
glyma.Wm82.gnm4.Gm12:11716051-11716511	MSTRG.22592.1	CNT2034161	-
glyma.Wm82.gnm4.Gm12:35650803-35651533	MSTRG.22925.1	CNT2033246	-
glyma.Wm82.gnm4.Gm12:36494247-36495308	MSTRG.22980.1	CNT2034637	-
glyma.Wm82.gnm4.Gm13:20419607-20421575	MSTRG.23940.1	CNT2033691	-
glyma.Wm82.gnm4.Gm14:21987916-21988923	MSTRG.26966.1	CNT2034795	-
glyma.Wm82.gnm4.Gm14:29848588-29849255	MSTRG.27068.1	CNT2034067	-
glyma.Wm82.gnm4.Gm14:6431723-6432330	MSTRG.26603.1	CNT2033089	-
glyma.Wm82.gnm4.Gm14:7241544-7242336	MSTRG.26657.1	CNT2034105	-
glyma.Wm82.gnm4.Gm18:14809241-14810061	MSTRG.33482.1	CNT2034695	-
glyma.Wm82.gnm4.Gm18:1913316-1914121	MSTRG.32905.1	CNT2032202	-
glyma.Wm82.gnm4.Gm18:8310016-8310640	MSTRG.33307.1	CNT2032387	-
glyma.Wm82.gnm4.Gm19:11847054-11847724	MSTRG.34925.1	CNT2034695	-
glyma.Wm82.gnm4.Gm02:15269094-15273608	MSTRG.2711.1	-	lcl|Gmax_Glyma.10G030300.1
glyma.Wm82.gnm4.Gm03:35636196-35637089	MSTRG.4562.1	-	lcl|Gmax_Glyma.19G132100.1
glyma.Wm82.gnm4.Gm04:40995815-40996559	MSTRG.6725.1	-	lcl|Gmax_Glyma.04G168000.1
glyma.Wm82.gnm4.Gm05:14055850-14057355	MSTRG.7972.1	-	lcl|Gmax_Glyma.05G088700.1
glyma.Wm82.gnm4.Gm05:34815130-34815775	MSTRG.8442.1	-	lcl|Gmax_Glyma.05G154500.1
glyma.Wm82.gnm4.Gm06:17877638-17878378	MSTRG.10688.1	-	lcl|Gmax_Glyma.06G197400.1
glyma.Wm82.gnm4.Gm10:51448171-51448605	MSTRG.19778.1	-	lcl|Gmax_Glyma.10G297000.1
glyma.Wm82.gnm4.Gm11:10155377-10155848	MSTRG.20838.1	-	lcl|Gmax_Glyma.11G133100.1
glyma.Wm82.gnm4.Gm11:39203384-39204631	MSTRG.21723.1	-	lcl|Gmax_Glyma.11G252100.1
glyma.Wm82.gnm4.Gm11:5106312-5109411	MSTRG.20333.1	-	lcl|Gmax_Glyma.01G175700.9
glyma.Wm82.gnm4.Gm12:10452224-10453336	MSTRG.22547.1	-	lcl|Gmax_Glyma.12G110000.1
glyma.Wm82.gnm4.Gm12:8443629-8445408	MSTRG.22475.2	-	lcl|Gmax_Glyma.12G098300.1
glyma.Wm82.gnm4.Gm15:45611889-45612270	MSTRG.29122.1	-	lcl|Gmax_Glyma.15G238100.1
glyma.Wm82.gnm4.Gm16:11016599-11017555	MSTRG.29984.1	-	lcl|Gmax_Glyma.16G087800.1
glyma.Wm82.gnm4.Gm17:34526944-34527499	MSTRG.32321.1	-	lcl|Gmax_Glyma.17G210100.1
glyma.Wm82.gnm4.Gm17:9805491-9808080	MSTRG.31771.1	-	lcl|Gmax_Glyma.17G123000.1
glyma.Wm82.gnm4.Gm18:38660405-38661194	MSTRG.33693.1	-	lcl|Gmax_Glyma.18G166500.1
glyma.Wm82.gnm4.Gm18:58040480-58041976	MSTRG.34561.2	-	lcl|Gmax_Glyma.18G300000.1
glyma.Wm82.gnm4.Gm18:7147689-7151130	MSTRG.33264.1	-	lcl|Gmax_Glyma.18G075900.1
glyma.Wm82.gnm4.Gm18:7410219-7412710	MSTRG.33278.1	-	lcl|Gmax_Glyma.18G078100.1
glyma.Wm82.gnm4.Gm20:36438736-36443164	MSTRG.37045.1	-	lcl|Gmax_Glyma.20G122000.1
glyma.Wm82.gnm4.Gm20:37436310-37436809	MSTRG.37143.1	-	lcl|Gmax_Glyma.20G134900.2
glyma.Wm82.gnm4.Gm20:39126746-39127348	MSTRG.37277.1	-	lcl|Gmax_Glyma.20G152700.1
glyma.Wm82.gnm4.scaffold_69:11658-14255	MSTRG.38118.1	-	lcl|Gmax_Glyma.07G063200.1
glyma.Wm82.gnm4.scaffold_69:85099-87629	MSTRG.38126.1	-	lcl|Gmax_Glyma.07G063200.1
glyma.Wm82.gnm4.Gm01:17441961-17446463	MSTRG.485.1	-	-	GMAX_LNC004190.1
glyma.Wm82.gnm4.Gm01:51133487-51134502	MSTRG.998.1	-	-	GMAX_LNC000189.1
glyma.Wm82.gnm4.Gm02:40626270-40627779	MSTRG.3047.1	-	-	GMAX_LNC000427.1
glyma.Wm82.gnm4.Gm02:46816363-46817067	MSTRG.3489.1	-	-	VRAD_LNC004451.3
glyma.Wm82.gnm4.Gm02:5280435-5281825	MSTRG.2106.1	-	-	GMAX_LNC000285.1
glyma.Wm82.gnm4.Gm04:19260832-19263096	MSTRG.6559.4	-	-	GMAX_LNC000822.1
glyma.Wm82.gnm4.Gm04:45648710-45649368	MSTRG.6913.1	-	-	GMAX_LNC000884.1
glyma.Wm82.gnm4.Gm05:1623711-1625777	MSTRG.7526.3	-	-	GMAX_LNC004074.1
glyma.Wm82.gnm4.Gm05:1623806-1625777	MSTRG.7526.4	-	-	GMAX_LNC004074.1
glyma.Wm82.gnm4.Gm07:18811634-18813680	MSTRG.12497.1	-	-	GMAX_LNC001515.1
glyma.Wm82.gnm4.Gm07:37689402-37690074	MSTRG.12794.1	-	-	GMAX_LNC001565.1
glyma.Wm82.gnm4.Gm07:5642762-5643618	MSTRG.11872.1	-	-	GMAX_LNC001428.1
glyma.Wm82.gnm4.Gm07:6312540-6313493	MSTRG.11918.1	-	-	GMAX_LNC001433.1
glyma.Wm82.gnm4.Gm07:8081847-8082773	MSTRG.12057.1	-	-	GMAX_LNC001446.2
glyma.Wm82.gnm4.Gm07:9840675-9841026	MSTRG.12163.1	-	-	GMAX_LNC001462.2
glyma.Wm82.gnm4.Gm09:3538051-3538668	MSTRG.16181.1	-	-	GMAX_LNC001914.1
glyma.Wm82.gnm4.Gm09:43748981-43750099	MSTRG.17129.3	-	-	GMAX_LNC002060.1
glyma.Wm82.gnm4.Gm09:44075589-44076654	MSTRG.17157.1	-	-	GMAX_LNC002064.1
glyma.Wm82.gnm4.Gm09:5056579-5056811	MSTRG.16268.1	-	-	GMAX_LNC001934.2
glyma.Wm82.gnm4.Gm10:4025250-4025914	MSTRG.18077.1	-	-	GMAX_LNC002138.1
glyma.Wm82.gnm4.Gm10:4155082-4155803	MSTRG.18084.1	-	-	GMAX_LNC002139.1
glyma.Wm82.gnm4.Gm10:45001467-45001799	MSTRG.19176.1	-	-	OEUR_LNC010280.1
glyma.Wm82.gnm4.Gm10:45771046-45772166	MSTRG.19241.1	-	-	GMAX_LNC002335.2
glyma.Wm82.gnm4.Gm10:4739889-4740469	MSTRG.18141.1	-	-	GMAX_LNC002147.1
glyma.Wm82.gnm4.Gm10:49226932-49227591	MSTRG.19561.1	-	-	GMAX_LNC002357.1
glyma.Wm82.gnm4.Gm11:10149115-10150273	MSTRG.20845.2	-	-	GMAX_LNC002446.12
glyma.Wm82.gnm4.Gm11:3590366-3590822	MSTRG.20175.1	-	-	GMAX_LNC002395.1
glyma.Wm82.gnm4.Gm13:20939146-20939956	MSTRG.23987.1	-	-	GMAX_LNC002878.1
glyma.Wm82.gnm4.Gm14:32530077-32530649	MSTRG.27104.1	-	-	GMAX_LNC003184.1
glyma.Wm82.gnm4.Gm14:45936315-45936751	MSTRG.27277.1	-	-	GMAX_LNC003664.1
glyma.Wm82.gnm4.Gm15:32329690-32330506	MSTRG.28968.1	-	-	GMAX_LNC000807.1
glyma.Wm82.gnm4.Gm15:7030232-7031240	MSTRG.28223.1	-	-	GBAR_LNC005734.1
glyma.Wm82.gnm4.Gm17:40493599-40494309	MSTRG.32613.1	-	-	GMAX_LNC004000.1
glyma.Wm82.gnm4.Gm17:5880922-5882680	MSTRG.31399.1	-	-	GMAX_LNC000427.1
glyma.Wm82.gnm4.Gm19:1951504-1953524	MSTRG.34713.1	-	-	GMAX_LNC002846.5
glyma.Wm82.gnm4.Gm19:42867959-42868856	MSTRG.35580.1	-	-	GMAX_LNC004427.1
glyma.Wm82.gnm4.Gm19:44687679-44688533	MSTRG.35736.1	-	-	GMAX_LNC004445.1
glyma.Wm82.gnm4.Gm19:50972462-50973918	MSTRG.36313.1	-	-	GMAX_LNC004493.1
glyma.Wm82.gnm4.Gm20:40256451-40256981	MSTRG.37380.1	-	-	GMAX_LNC004626.1
glyma.Wm82.gnm4.Gm20:40477924-40478479	MSTRG.37394.1	-	-	GMAX_LNC004628.1
glyma.Wm82.gnm4.scaffold_69:21989-23786	MSTRG.38122.1	-	-	GMAX_LNC001426.1
glyma.Wm82.gnm4.Gm02:2659699-2660875	MSTRG.1882.1	CNT20209072	lcl|Pvulgaris_Phvul.002G076100.1	GMAX_LNC000021.1
glyma.Wm82.gnm4.Gm02:4943398-4949002	MSTRG.2075.1	CNT20124498	lcl|Gmax_Glyma.02G054900.1	GMAX_LNC000282.1
glyma.Wm82.gnm4.Gm03:8535165-8539824	MSTRG.4169.1	CNT2035035	lcl|Gmax_Glyma.17G195400.1	GMAX_LNC000045.1
glyma.Wm82.gnm4.Gm04:48402724-48406013	MSTRG.7135.1	CNT2032670	lcl|Gmax_Glyma.04G226000.1	LUSI_LNC003359.4
glyma.Wm82.gnm4.Gm07:40724615-40730458	MSTRG.12954.1	CNT2033350	lcl|Gmax_Glyma.07G226600.1	GMAX_LNC000826.1
glyma.Wm82.gnm4.Gm07:40724811-40730458	MSTRG.12954.4	CNT2033350	lcl|Gmax_Glyma.07G226600.1	GMAX_LNC000826.1
glyma.Wm82.gnm4.Gm11:34629803-34632990	MSTRG.21389.1	CNT2032846	lcl|Gmax_Glyma.04G126800.1	GMAX_LNC004327.1
glyma.Wm82.gnm4.Gm14:12264678-12267639	MSTRG.26853.1	CNT2032623	lcl|Gmax_Glyma.18G109000.2	GMAX_LNC000081.1
glyma.Wm82.gnm4.Gm18:2980299-2980825	MSTRG.32993.1	CNT2035092	lcl|Gmax_Glyma.04G011500.2	GMAX_LNC001741.1
glyma.Wm82.gnm4.Gm19:28522707-28526300	MSTRG.35013.1	CNT2032112	lcl|Gmax_Glyma.14G144900.2	GMAX_LNC000116.1
glyma.Wm82.gnm4.Gm02:3841564-3842913	MSTRG.1976.1	CNT2035045	lcl|Gmax_Glyma.02G041100.1	-
glyma.Wm82.gnm4.Gm05:37011963-37013307	MSTRG.8636.1	CNT2032385	lcl|Gmax_Glyma.05G182100.1	-
glyma.Wm82.gnm4.Gm07:9893846-9894419	MSTRG.12168.1	CNT2033975	lcl|Gmax_Glyma.14G114600.1	-
glyma.Wm82.gnm4.Gm14:6203703-6206896	MSTRG.26588.1	CNT2033171	lcl|Gmax_Glyma.14G075400.1	-
glyma.Wm82.gnm4.Gm14:6517937-6520460	MSTRG.26609.1	CNT2034836	lcl|Gmax_Glyma.14G078300.1	-
glyma.Wm82.gnm4.Gm18:15233171-15237577	MSTRG.33492.3	CNT2033639	lcl|Gmax_Glyma.04G113800.1	-
glyma.Wm82.gnm4.Gm18:15233210-15237577	MSTRG.33492.6	CNT2033639	lcl|Gmax_Glyma.04G113800.1	-
glyma.Wm82.gnm4.Gm20:166184-166627	MSTRG.36344.1	CNT2032030	lcl|Gmax_Glyma.20G001500.1	-
glyma.Wm82.gnm4.Gm20:19229378-19234762	MSTRG.36666.1	CNT2032717	lcl|Gmax_Glyma.20G061900.1	-
glyma.Wm82.gnm4.Gm03:4865140-4867137	MSTRG.4080.1	CNT2032846	-	GMAX_LNC003545.1
glyma.Wm82.gnm4.Gm06:40949057-40951400	MSTRG.10929.1	CNT2032325	-	GMAX_LNC004723.1
glyma.Wm82.gnm4.Gm10:46125247-46126738	MSTRG.19269.1	CNT2032938	-	GMAX_LNC002699.1
glyma.Wm82.gnm4.Gm14:42953793-42956265	MSTRG.27190.1	CNT2033621	-	GMAX_LNC001515.1
glyma.Wm82.gnm4.Gm15:24398019-24399182	MSTRG.28911.1	CNT2033143	-	GMAX_LNC000843.1
glyma.Wm82.gnm4.Gm15:48205769-48207504	MSTRG.29137.2	CNT2034410	-	VRAD_LNC004122.2
glyma.Wm82.gnm4.Gm15:50414692-50415915	MSTRG.29213.1	CNT20209716	-	VRAD_LNC004108.3
glyma.Wm82.gnm4.Gm17:27513966-27515625	MSTRG.32237.1	CNT2034887	-	GMAX_LNC001515.1
glyma.Wm82.gnm4.Gm18:18627829-18628728	MSTRG.33543.1	CNT2032442	-	GMAX_LNC004118.1
glyma.Wm82.gnm4.Gm20:4668669-4669201	MSTRG.36539.1	CNT2033211	-	GMAX_LNC004514.1
glyma.Wm82.gnm4.scaffold_69:15716-16613	MSTRG.38119.1	CNT2032287	-	GMAX_LNC001425.1
glyma.Wm82.gnm4.scaffold_69:89254-90054	MSTRG.38127.1	CNT2032287	-	GMAX_LNC001425.1
glyma.Wm82.gnm4.Gm01:3870161-3870896	MSTRG.266.1	-	lcl|Gmax_Glyma.05G099800.2	GMAX_LNC004179.1
glyma.Wm82.gnm4.Gm01:54931119-54932134	MSTRG.1353.1	-	lcl|Gmax_Glyma.01G205800.1	GMAX_LNC000226.1
glyma.Wm82.gnm4.Gm03:45728614-45729647	MSTRG.5493.1	-	lcl|Gmax_Glyma.03G249400.1	GMAX_LNC000704.1
glyma.Wm82.gnm4.Gm06:18004199-18006543	MSTRG.10694.1	-	lcl|Gmax_Glyma.08G263500.1	GMAX_LNC001787.1
glyma.Wm82.gnm4.Gm10:44917083-44918894	MSTRG.19169.1	-	lcl|Gmax_Glyma.10G216800.1	GMAX_LNC001767.1
glyma.Wm82.gnm4.Gm10:44917086-44918894	MSTRG.19169.2	-	lcl|Gmax_Glyma.10G216800.1	GMAX_LNC001767.1
glyma.Wm82.gnm4.Gm10:44917497-44918894	MSTRG.19169.5	-	lcl|Gmax_Glyma.10G216800.1	GMAX_LNC001767.1
glyma.Wm82.gnm4.Gm10:51443272-51443893	MSTRG.19777.1	-	lcl|Gmax_Glyma.20G247800.1	VRAD_LNC009420.8
glyma.Wm82.gnm4.Gm13:15660680-15661197	MSTRG.23712.1	-	lcl|Gmax_Glyma.13G066000.1	GMAX_LNC002846.4
glyma.Wm82.gnm4.Gm15:10629295-10629844	MSTRG.28524.1	-	lcl|Gmax_Glyma.15G133000.1	GMAX_LNC003405.1
glyma.Wm82.gnm4.Gm19:37454484-37455934	MSTRG.35225.2	-	lcl|Gmax_Glyma.19G114700.1	VRAD_LNC017995.1
glyma.Wm82.gnm4.Gm20:46030270-46031279	MSTRG.37837.1	-	lcl|Pvulgaris_Phvul.007G116200.1	GMAX_LNC004673.1

## Sheet: Table S4
Table S4. List of potential DE-lncRNAs in SCN dataset
SCN_DE_lncRNAs	LogFC
MSTRG.11659.1	4.4069
MSTRG.11710.1	3.11357
MSTRG.1244.1	-7.8002
MSTRG.13792.1	1.31664
MSTRG.1418.1	-2.26112
MSTRG.15299.1	3.85977
MSTRG.15415.1	-0.747301
MSTRG.17118.1	-3.92155
MSTRG.17868.1	4.22511
MSTRG.18480.1	-2.18692
MSTRG.18761.1	2.78823
MSTRG.18793.1	-1.4106
MSTRG.19370.1	2.31514
MSTRG.1973.1	-0.438517
MSTRG.19854.1	-2.63262
MSTRG.22162.1	-2.40521
MSTRG.23165.1	2.49376
MSTRG.23428.1	3.5411
MSTRG.23429.1	4.51942
MSTRG.25649.1	1.71708
MSTRG.25773.1	1.62853
MSTRG.25793.2	-1.43168
MSTRG.26076.1	0.0961042
MSTRG.26464.1	-3.18976
MSTRG.26615.1	-2.36312
MSTRG.28637.1	3.94505
MSTRG.30664.2	9.54976
MSTRG.31765.1	1.2014
MSTRG.31776.2	2.51367
MSTRG.33149.1	1.05754
MSTRG.33217.3	2.0101
MSTRG.33379.1	3.26483
MSTRG.33792.1	-4.83874
MSTRG.35537.1	4.73662
MSTRG.35950.1	1.40716
MSTRG.36168.1	-2.11294
MSTRG.5135.1	-1.30087
MSTRG.53.1	2.34647
MSTRG.5892.1	3.25403
MSTRG.6283.1	2.81405
MSTRG.669.1	2.52663
MSTRG.7333.1	2.9903

## Sheet: Table S5
Table S4. List of potential DE-lncRNAs in RAD
RAD_DE_lncRNAs	LogFC
MSTRG.10041.1	-0.636021
MSTRG.10694.1	-0.44714
MSTRG.11145.1	-0.597431
MSTRG.11315.1	-0.0309954
MSTRG.11372.4	-0.715447
MSTRG.11872.1	0.146305
MSTRG.11918.1	2.13639
MSTRG.12057.1	0.389426
MSTRG.12117.4	0.311062
MSTRG.12244.1	-0.604259
MSTRG.13980.1	0.752325
MSTRG.15126.1	0.341812
MSTRG.15368.1	0.0142725
MSTRG.16181.1	-0.89134
MSTRG.16628.1	0.0883023
MSTRG.17076.2	-0.398324
MSTRG.17223.1	0.0508738
MSTRG.17841.2	-0.558992
MSTRG.18141.1	-0.115343
MSTRG.19269.1	1.22382
MSTRG.1976.1	0.113287
MSTRG.19777.1	0.893534
MSTRG.19778.1	1.1173
MSTRG.19991.1	0.300272
MSTRG.20135.1	-0.0315417
MSTRG.20948.1	-0.475848
MSTRG.20950.1	-0.0396941
MSTRG.2106.1	-1.16225
MSTRG.21389.1	-0.571042
MSTRG.22547.1	2.17379
MSTRG.2272.1	-0.313009
MSTRG.22980.1	-0.732236
MSTRG.23746.1	0.117452
MSTRG.23987.1	-0.16874
MSTRG.240.1	-0.358275
MSTRG.240.2	-0.0245271
MSTRG.2496.1	0.023333
MSTRG.25992.1	-0.256747
MSTRG.26588.1	-1.05633
MSTRG.26609.1	-0.0891734
MSTRG.27068.1	1.19187
MSTRG.27104.1	2.33399
MSTRG.2711.1	-0.308557
MSTRG.27272.1	-0.071325
MSTRG.27277.1	-1.36243
MSTRG.27294.2	0.987603
MSTRG.28524.1	0.333497
MSTRG.3047.1	-0.275923
MSTRG.30686.1	0.047047
MSTRG.31399.1	-0.659958
MSTRG.31771.1	-0.334862
MSTRG.32341.3	-0.263188
MSTRG.32613.1	2.08817
MSTRG.32646.1	0.134462
MSTRG.32993.1	-1.30164
MSTRG.33292.1	0.0384312
MSTRG.33362.1	0.28308
MSTRG.33450.1	-0.881031
MSTRG.33482.1	-0.15464
MSTRG.33492.3	0.900807
MSTRG.33540.1	0.566042
MSTRG.33543.1	0.0819722
MSTRG.3363.3	1.65612
MSTRG.3489.1	0.644689
MSTRG.34925.1	0.0284372
MSTRG.35175.1	-0.308158
MSTRG.35225.2	-0.301038
MSTRG.35270.1	0.152563
MSTRG.35580.1	-4.59576
MSTRG.36518.1	-0.383058
MSTRG.36631.1	0.0861257
MSTRG.36776.1	10.1536
MSTRG.36794.1	-0.56703
MSTRG.37837.1	-1.2115
MSTRG.38015.1	-0.31402
MSTRG.38023.1	-0.583689
MSTRG.38037.1	0.172145
MSTRG.38041.1	-0.654147
MSTRG.38067.1	-0.22954
MSTRG.38076.1	-1.16975
MSTRG.38080.1	-0.0586326
MSTRG.38090.1	-0.286585
MSTRG.38118.1	-0.0970888
MSTRG.38119.1	-0.019922
MSTRG.38121.1	-0.225053
MSTRG.38122.1	0.657763
MSTRG.38126.1	-0.457694
MSTRG.38127.1	-0.69218
MSTRG.38160.1	-0.388797
MSTRG.38162.1	2.86986
MSTRG.38163.1	2.27687
MSTRG.38164.1	1.28144
MSTRG.38168.1	-0.766857
MSTRG.38169.1	-0.731443
MSTRG.4133.1	-0.00688654
MSTRG.4169.1	0.113394
MSTRG.5492.1	0.178481
MSTRG.5708.3	-1.25131
MSTRG.6228.1	-0.0310083
MSTRG.6341.1	-1.00032
MSTRG.760.1	-0.120684
MSTRG.761.1	-0.26329
MSTRG.7642.3	0.460377
MSTRG.8066.1	-0.255788
MSTRG.8068.1	-0.422502
MSTRG.8092.1	-0.239298
MSTRG.8133.1	0.118659
MSTRG.8304.1	-0.3932
MSTRG.8636.1	2.09672
MSTRG.9581.1	2.51817
MSTRG.998.1	-0.531419

## Sheet: Table S6
Table S6. The obtained ME-lncRNAs with the descending and ascending expression pattern in SCN dataset
SCN-lncRNA	DE	p-value	q-value	SVDE	Expression pattern	DE-lncRNA
MSTRG.33149.1	2	0.209743	0.963497	0.37	ascending	DE
MSTRG.31765.1	2	0.209743	0.963497	0.57	ascending	DE
MSTRG.31915.1	2	0.209743	0.963497	0.75	ascending
MSTRG.19869.1	2	0.209743	0.963497	0.78	ascending
MSTRG.34541.1	3	0.247071	0.895579	0.23	ascending
MSTRG.385.1	3	0.247071	0.895579	0.28	ascending
MSTRG.33379.1	3	0.247071	0.895579	0.39	ascending	DE
MSTRG.14806.1	3	0.247071	0.895579	0.43	ascending
MSTRG.28821.1	3	0.247071	0.895579	0.46	ascending
MSTRG.19713.1	3	0.247071	0.895579	0.53	ascending
MSTRG.7333.1	3	0.247071	0.895579	0.55	ascending	DE
MSTRG.15820.1	3	0.247071	0.895579	0.63	ascending
MSTRG.23694.1	3	0.247071	0.895579	0.64	ascending
MSTRG.36165.1	3	0.247071	0.895579	0.65	ascending
MSTRG.33125.1	3	0.247071	0.895579	0.71	ascending
MSTRG.21633.1	3	0.247071	0.895579	0.72	ascending
MSTRG.6699.2	3	0.247071	0.895579	0.79	ascending
MSTRG.33080.1	3	0.247071	0.895579	0.8	ascending
MSTRG.1270.1	3	0.247071	0.895579	0.86	ascending
MSTRG.27430.1	3	0.247071	0.895579	0.97	ascending
MSTRG.20057.1	3	0.247071	0.895579	0.97	ascending
MSTRG.2318.1	4	0.306347	0.852162	0.36	ascending
MSTRG.33695.1	4	0.306347	0.852162	0.36	ascending
MSTRG.26190.1	4	0.306347	0.852162	0.38	ascending
MSTRG.18591.1	4	0.306347	0.852162	0.38	ascending
MSTRG.1855.1	4	0.306347	0.852162	0.39	ascending
MSTRG.513.1	4	0.306347	0.852162	0.48	ascending
MSTRG.25603.1	4	0.306347	0.852162	0.49	ascending
MSTRG.10291.1	4	0.306347	0.852162	0.52	ascending
MSTRG.2355.1	4	0.306347	0.852162	0.56	ascending
MSTRG.28637.1	4	0.306347	0.852162	0.59	ascending	DE
MSTRG.9041.1	4	0.306347	0.852162	0.63	ascending
MSTRG.25693.1	4	0.306347	0.852162	0.64	ascending
MSTRG.27433.1	4	0.306347	0.852162	0.71	ascending
MSTRG.12159.1	4	0.306347	0.852162	0.71	ascending
MSTRG.30640.1	4	0.306347	0.852162	0.72	ascending
MSTRG.16720.1	4	0.306347	0.852162	0.73	ascending
MSTRG.33524.1	4	0.306347	0.852162	0.74	ascending
MSTRG.4261.1	4	0.306347	0.852162	0.75	ascending
MSTRG.12203.1	4	0.306347	0.852162	0.77	ascending
MSTRG.34706.1	4	0.306347	0.852162	0.8	ascending
MSTRG.3856.1	4	0.306347	0.852162	0.86	ascending
MSTRG.16124.2	4	0.306347	0.852162	0.87	ascending
MSTRG.18092.1	4	0.306347	0.852162	0.87	ascending
MSTRG.11470.1	4	0.306347	0.852162	0.94	ascending
MSTRG.7595.1	4	0.306347	0.852162	0.94	ascending
MSTRG.35537.1	4	0.306347	0.852162	0.94	ascending	DE
MSTRG.22078.6	4	0.306347	0.852162	0.96	ascending
MSTRG.36128.1	5	0.42383	0.894034	0.27	ascending
MSTRG.34838.1	5	0.42383	0.894034	0.33	ascending
MSTRG.36209.1	5	0.42383	0.894034	0.33	ascending
MSTRG.19925.1	5	0.42383	0.894034	0.41	ascending
MSTRG.14342.1	5	0.42383	0.894034	0.42	ascending
MSTRG.11293.4	5	0.42383	0.894034	0.44	ascending
MSTRG.275.1	5	0.42383	0.894034	0.51	ascending
MSTRG.28169.1	5	0.42383	0.894034	0.52	ascending
MSTRG.21360.1	5	0.42383	0.894034	0.55	ascending
MSTRG.30666.1	5	0.42383	0.894034	0.55	ascending
MSTRG.11190.1	5	0.42383	0.894034	0.55	ascending
MSTRG.27346.1	5	0.42383	0.894034	0.57	ascending
MSTRG.10716.5	5	0.42383	0.894034	0.58	ascending
MSTRG.22078.3	5	0.42383	0.894034	0.6	ascending
MSTRG.728.1	5	0.42383	0.894034	0.6	ascending
MSTRG.34707.1	5	0.42383	0.894034	0.68	ascending
MSTRG.16200.1	5	0.42383	0.894034	0.69	ascending
MSTRG.34963.1	5	0.42383	0.894034	0.82	ascending
MSTRG.10837.1	5	0.42383	0.894034	0.83	ascending
MSTRG.2212.1	5	0.42383	0.894034	0.86	ascending
MSTRG.27414.1	5	0.42383	0.894034	0.9	ascending
MSTRG.1789.2	5	0.42383	0.894034	0.91	ascending
MSTRG.9385.1	5	0.42383	0.894034	0.91	ascending
MSTRG.19784.1	5	0.42383	0.894034	0.92	ascending
MSTRG.2499.1	5	0.42383	0.894034	0.93	ascending
MSTRG.36118.1	6	0.61484	1	0.17	ascending
MSTRG.14997.1	6	0.61484	1	0.19	ascending
MSTRG.14395.1	6	0.61484	1	0.19	ascending
MSTRG.19048.1	6	0.61484	1	0.32	ascending
MSTRG.16259.1	6	0.61484	1	0.34	ascending
MSTRG.227.1	6	0.61484	1	0.35	ascending
MSTRG.34711.1	6	0.61484	1	0.35	ascending
MSTRG.35030.1	6	0.61484	1	0.44	ascending
MSTRG.238.1	6	0.61484	1	0.48	ascending
MSTRG.10153.1	6	0.61484	1	0.49	ascending
MSTRG.30463.1	6	0.61484	1	0.53	ascending
MSTRG.18196.1	6	0.61484	1	0.54	ascending
MSTRG.30636.1	6	0.61484	1	0.56	ascending
MSTRG.17319.1	6	0.61484	1	0.61	ascending
MSTRG.25604.1	6	0.61484	1	0.69	ascending
MSTRG.30961.1	6	0.61484	1	0.7	ascending
MSTRG.7803.1	6	0.61484	1	0.84	ascending
MSTRG.3846.1	6	0.61484	1	0.84	ascending
MSTRG.33543.1	6	0.61484	1	0.89	ascending
MSTRG.21253.2	6	0.61484	1	0.91	ascending
MSTRG.5335.3	6	0.61484	1	0.92	ascending
MSTRG.7805.1	6	0.61484	1	0.95	ascending
MSTRG.7366.3	6	0.61484	1	0.99	ascending
MSTRG.36208.1	7	0.821739	1	0.1	ascending
MSTRG.33383.1	7	0.821739	1	0.38	ascending
MSTRG.34481.3	7	0.821739	1	0.48	ascending
MSTRG.18092.2	7	0.821739	1	0.49	ascending
MSTRG.11650.1	7	0.821739	1	0.54	ascending
MSTRG.1232.1	7	0.821739	1	0.58	ascending
MSTRG.36195.1	7	0.821739	1	0.6	ascending
MSTRG.33428.2	7	0.821739	1	0.62	ascending
MSTRG.30684.1	7	0.821739	1	0.63	ascending
MSTRG.29296.1	7	0.821739	1	0.64	ascending
MSTRG.21711.1	7	0.821739	1	0.65	ascending
MSTRG.25162.1	7	0.821739	1	0.67	ascending
MSTRG.15725.1	7	0.821739	1	0.78	ascending
MSTRG.11812.1	7	0.821739	1	0.95	ascending
MSTRG.14521.1	7	0.821739	1	0.99	ascending
MSTRG.14271.1	8	0.95595	1	0.41	ascending
MSTRG.31585.1	8	0.95595	1	0.47	ascending
MSTRG.31825.1	8	0.95595	1	0.77	ascending
MSTRG.31546.1	8	0.95595	1	0.85	ascending
MSTRG.22491.1	9	0.99828	1	0	ascending
MSTRG.31653.1	9	0.99828	1	0.1	ascending
MSTRG.11361.1	2	0.206591	0.933372	0.55	descending
MSTRG.18163.1	2	0.206591	0.933372	0.56	descending
MSTRG.11549.1	2	0.206591	0.933372	0.86	descending
MSTRG.26535.1	3	0.239397	0.869779	0.66	descending
MSTRG.8455.1	3	0.239397	0.869779	0.8	descending
MSTRG.32541.1	4	0.297242	0.823539	0.09	descending
MSTRG.9897.1	4	0.297242	0.823539	0.11	descending
MSTRG.15683.1	4	0.297242	0.823539	0.27	descending
MSTRG.32805.1	4	0.297242	0.823539	0.38	descending
MSTRG.19935.1	4	0.297242	0.823539	0.42	descending
MSTRG.22078.1	4	0.297242	0.823539	0.45	descending
MSTRG.7077.1	4	0.297242	0.823539	0.49	descending
MSTRG.13747.2	4	0.297242	0.823539	0.53	descending
MSTRG.29186.1	4	0.297242	0.823539	0.53	descending
MSTRG.36241.1	4	0.297242	0.823539	0.59	descending
MSTRG.22231.1	4	0.297242	0.823539	0.63	descending
MSTRG.11835.1	4	0.297242	0.823539	0.71	descending
MSTRG.25162.1	4	0.297242	0.823539	0.71	descending
MSTRG.526.1	4	0.297242	0.823539	0.74	descending
MSTRG.31561.1	4	0.297242	0.823539	0.94	descending
MSTRG.30110.1	4	0.297242	0.823539	0.98	descending
MSTRG.11422.1	5	0.41849	0.859812	0.04	descending
MSTRG.10217.1	5	0.41849	0.859812	0.18	descending
MSTRG.22491.1	5	0.41849	0.859812	0.21	descending
MSTRG.11651.1	5	0.41849	0.859812	0.25	descending
MSTRG.20083.1	5	0.41849	0.859812	0.32	descending
MSTRG.36201.1	5	0.41849	0.859812	0.32	descending
MSTRG.36195.1	5	0.41849	0.859812	0.38	descending
MSTRG.31826.1	5	0.41849	0.859812	0.38	descending
MSTRG.31585.1	5	0.41849	0.859812	0.42	descending
MSTRG.35091.1	5	0.41849	0.859812	0.5	descending
MSTRG.5259.1	5	0.41849	0.859812	0.52	descending
MSTRG.21896.1	5	0.41849	0.859812	0.54	descending
MSTRG.227.1	5	0.41849	0.859812	0.55	descending
MSTRG.31218.2	5	0.41849	0.859812	0.55	descending
MSTRG.36161.1	5	0.41849	0.859812	0.56	descending
MSTRG.36200.1	5	0.41849	0.859812	0.57	descending
MSTRG.34690.1	5	0.41849	0.859812	0.59	descending
MSTRG.22162.1	5	0.41849	0.859812	0.59	descending	DE
MSTRG.24571.1	5	0.41849	0.859812	0.61	descending
MSTRG.8612.1	5	0.41849	0.859812	0.62	descending
MSTRG.18679.1	5	0.41849	0.859812	0.65	descending
MSTRG.19670.1	5	0.41849	0.859812	0.66	descending
MSTRG.36210.1	5	0.41849	0.859812	0.7	descending
MSTRG.3007.1	5	0.41849	0.859812	0.72	descending
MSTRG.27380.1	5	0.41849	0.859812	0.75	descending
MSTRG.15725.1	5	0.41849	0.859812	0.78	descending
MSTRG.18480.1	5	0.41849	0.859812	1	descending	DE
MSTRG.34436.1	6	0.615774	0.976133	0.12	descending
MSTRG.19854.1	6	0.615774	0.976133	0.18	descending	DE
MSTRG.728.1	6	0.615774	0.976133	0.48	descending
MSTRG.36221.1	6	0.615774	0.976133	0.5	descending
MSTRG.31825.1	6	0.615774	0.976133	0.53	descending
MSTRG.26509.1	6	0.615774	0.976133	0.56	descending
MSTRG.31835.1	6	0.615774	0.976133	0.65	descending
MSTRG.31653.1	6	0.615774	0.976133	0.71	descending
MSTRG.13059.1	6	0.615774	0.976133	0.75	descending
MSTRG.30501.1	6	0.615774	0.976133	0.77	descending
MSTRG.36125.1	6	0.615774	0.976133	0.78	descending
MSTRG.11849.1	6	0.615774	0.976133	0.92	descending
MSTRG.7191.4	6	0.615774	0.976133	0.92	descending
MSTRG.494.1	6	0.615774	0.976133	0.99	descending
MSTRG.31842.1	6	0.615774	0.976133	0.99	descending
MSTRG.32806.1	7	0.828156	1	0.19	descending
MSTRG.275.1	7	0.828156	1	0.2	descending
MSTRG.10291.1	7	0.828156	1	0.23	descending
MSTRG.23802.7	7	0.828156	1	0.31	descending
MSTRG.34852.1	7	0.828156	1	0.33	descending
MSTRG.4058.1	7	0.828156	1	0.41	descending
MSTRG.36209.1	7	0.828156	1	0.63	descending
MSTRG.727.1	7	0.828156	1	0.71	descending
MSTRG.14997.1	7	0.828156	1	0.78	descending
MSTRG.10153.1	7	0.828156	1	0.79	descending
MSTRG.9385.1	7	0.828156	1	0.82	descending
MSTRG.1789.2	7	0.828156	1	0.88	descending
MSTRG.34706.1	8	0.960063	1	0.54	descending
MSTRG.25385.1	8	0.960063	1	0.69	descending
MSTRG.32376.1	8	0.960063	1	0.69	descending
MSTRG.20564.1	8	0.960063	1	0.75	descending
MSTRG.25112.1	8	0.960063	1	0.9	descending
MSTRG.30513.1	9	0.998603	1	0.41	descending

## Sheet: Table S7
Table S7. The obtained ME-lncRNAs with the descending and ascending expression pattern in RAD
RAD-lncRNA	DE	p-value	q-value	SVDE	Expression pattern	Sample	DE-lncRNA
MSTRG.701.1	4	0.534062	0.929947	0.73	ascending	Control
MSTRG.38023.1	4	0.534062	0.929947	0.93	ascending	Control	DE
MSTRG.6596.1	4	0.534062	0.929947	1	ascending	Control
MSTRG.20838.1	4	0.534062	0.929947	1	ascending	Control
MSTRG.17157.1	5	0.633906	0.923867	0.34	ascending	Control
MSTRG.31236.1	5	0.633906	0.923867	0.5	ascending	Control
MSTRG.32341.3	5	0.633906	0.923867	0.59	ascending	Control	DE
MSTRG.33693.1	5	0.633906	0.923867	0.79	ascending	Control
MSTRG.31921.1	6	0.762806	0.950971	0.51	ascending	Control
MSTRG.5119.1	6	0.762806	0.950971	0.6	ascending	Control
MSTRG.37380.1	6	0.762806	0.950971	0.7	ascending	Control
MSTRG.23747.1	6	0.762806	0.950971	0.78	ascending	Control
MSTRG.7526.3	7	0.88845	0.991893	0.35	ascending	Control
MSTRG.19176.1	7	0.88845	0.991893	0.37	ascending	Control
MSTRG.12794.1	7	0.88845	0.991893	0.39	ascending	Control
MSTRG.22925.1	7	0.88845	0.991893	0.39	ascending	Control
MSTRG.1976.1	7	0.88845	0.991893	0.4	ascending	Control	DE
MSTRG.36666.1	7	0.88845	0.991893	0.41	ascending	Control
MSTRG.27190.1	7	0.88845	0.991893	0.48	ascending	Control
MSTRG.22797.1	7	0.88845	0.991893	0.62	ascending	Control
MSTRG.6913.1	7	0.88845	0.991893	0.64	ascending	Control
MSTRG.19269.1	7	0.88845	0.991893	0.66	ascending	Control	DE
MSTRG.21393.1	7	0.88845	0.991893	0.77	ascending	Control
MSTRG.16268.1	7	0.88845	0.991893	0.78	ascending	Control
MSTRG.11639.1	7	0.88845	0.991893	0.86	ascending	Control
MSTRG.10804.1	8	0.969991	1	0.22	ascending	Control
MSTRG.32313.1	8	0.969991	1	0.39	ascending	Control
MSTRG.26861.1	8	0.969991	1	0.47	ascending	Control
MSTRG.19169.2	8	0.969991	1	0.51	ascending	Control
MSTRG.14634.1	8	0.969991	1	0.51	ascending	Control
MSTRG.31253.3	9	0.998742	0.999633	0.59	ascending	Control
MSTRG.701.1	3	0.461939	0.953883	0.79	ascending	Infected
MSTRG.12954.1	4	0.536116	0.924699	0.3	ascending	Infected
MSTRG.36666.1	4	0.536116	0.924699	0.55	ascending	Infected
MSTRG.26626.1	4	0.536116	0.924699	0.61	ascending	Infected
MSTRG.10688.1	4	0.536116	0.924699	0.69	ascending	Infected
MSTRG.36344.1	5	0.635989	0.92008	0.31	ascending	Infected
MSTRG.7526.3	5	0.635989	0.92008	0.53	ascending	Infected
MSTRG.30044.1	5	0.635989	0.92008	0.57	ascending	Infected
MSTRG.33632.1	5	0.635989	0.92008	0.69	ascending	Infected
MSTRG.5493.1	5	0.635989	0.92008	0.75	ascending	Infected
MSTRG.19903.1	6	0.76379	0.971258	0.17	ascending	Infected
MSTRG.4317.1	6	0.76379	0.971258	0.38	ascending	Infected
MSTRG.4562.1	6	0.76379	0.971258	0.39	ascending	Infected
MSTRG.17225.1	6	0.76379	0.971258	0.45	ascending	Infected
MSTRG.20135.1	6	0.76379	0.971258	0.58	ascending	Infected
MSTRG.19561.1	6	0.76379	0.971258	0.67	ascending	Infected
MSTRG.37277.1	6	0.76379	0.971258	0.79	ascending	Infected
MSTRG.31253.3	6	0.76379	0.971258	0.93	ascending	Infected
MSTRG.36539.1	7	0.888792	1	0.32	ascending	Infected
MSTRG.38154.1	7	0.888792	1	0.38	ascending	Infected
MSTRG.28223.1	7	0.888792	1	0.38	ascending	Infected
MSTRG.6913.1	7	0.888792	1	0.41	ascending	Infected
MSTRG.38163.1	7	0.888792	1	0.42	ascending	Infected	DE
MSTRG.21717.2	7	0.888792	1	0.47	ascending	Infected
MSTRG.6725.1	7	0.888792	1	0.48	ascending	Infected
MSTRG.11639.1	7	0.888792	1	0.51	ascending	Infected
MSTRG.20884.1	7	0.888792	1	0.52	ascending	Infected
MSTRG.6738.1	7	0.888792	1	0.53	ascending	Infected
MSTRG.37380.1	7	0.888792	1	0.56	ascending	Infected
MSTRG.18084.1	7	0.888792	1	0.58	ascending	Infected
MSTRG.21723.1	7	0.888792	1	0.7	ascending	Infected
MSTRG.21393.1	7	0.888792	1	0.76	ascending	Infected
MSTRG.24469.2	8	0.969937	1	0.09	ascending	Infected
MSTRG.8442.1	8	0.969937	1	0.47	ascending	Infected
MSTRG.7937.1	8	0.969937	1	0.67	ascending	Infected
MSTRG.15204.1	9	0.998817	1	0.92	ascending	Infected
MSTRG.17225.1	3	0.44782	0.990826	0.54	descending	Control
MSTRG.12745.1	3	0.44782	0.990826	0.76	descending	Control
MSTRG.11639.1	4	0.518812	0.97183	0.41	descending	Control
MSTRG.27097.1	4	0.518812	0.97183	0.47	descending	Control
MSTRG.23940.1	4	0.518812	0.97183	0.51	descending	Control
MSTRG.2711.1	4	0.518812	0.97183	0.58	descending	Control	DE
MSTRG.15204.1	4	0.518812	0.97183	0.66	descending	Control
MSTRG.16268.1	4	0.518812	0.97183	0.88	descending	Control
MSTRG.16460.1	5	0.625527	0.970848	0	descending	Control
MSTRG.34713.1	5	0.625527	0.970848	0.38	descending	Control
MSTRG.36344.1	5	0.625527	0.970848	0.55	descending	Control
MSTRG.488.1	5	0.625527	0.970848	0.79	descending	Control
MSTRG.16145.1	5	0.625527	0.970848	0.86	descending	Control
MSTRG.760.1	6	0.765646	0.984313	0.15	descending	Control	DE
MSTRG.26626.1	6	0.765646	0.984313	0.42	descending	Control
MSTRG.4562.1	6	0.765646	0.984313	0.46	descending	Control
MSTRG.34039.1	6	0.765646	0.984313	0.58	descending	Control
MSTRG.26966.1	6	0.765646	0.984313	0.61	descending	Control
MSTRG.14634.1	6	0.765646	0.984313	0.64	descending	Control
MSTRG.35736.1	6	0.765646	0.984313	0.69	descending	Control
MSTRG.26657.1	6	0.765646	0.984313	0.72	descending	Control
MSTRG.12489.1	6	0.765646	0.984313	0.76	descending	Control
MSTRG.11150.1	6	0.765646	0.984313	0.82	descending	Control
MSTRG.38020.1	6	0.765646	0.984313	0.92	descending	Control
MSTRG.20135.1	6	0.765646	0.984313	0.95	descending	Control	DE
MSTRG.12117.4	7	0.899895	1	0.11	descending	Control	DE
MSTRG.19561.1	7	0.899895	1	0.2	descending	Control
MSTRG.17076.2	7	0.899895	1	0.33	descending	Control	DE
MSTRG.7526.3	7	0.899895	1	0.34	descending	Control
MSTRG.19269.1	7	0.899895	1	0.48	descending	Control	DE
MSTRG.19169.5	7	0.899895	1	0.65	descending	Control
MSTRG.32341.3	7	0.899895	1	0.81	descending	Control	DE
MSTRG.20175.1	7	0.899895	1	0.91	descending	Control
MSTRG.38026.1	8	0.977559	1	0.52	descending	Control
MSTRG.33693.1	8	0.977559	1	0.59	descending	Control
MSTRG.38021.1	3	0.446726	0.983603	0.49	descending	Infected
MSTRG.34328.2	4	0.516838	0.954991	0.33	descending	Infected
MSTRG.16268.1	4	0.516838	0.954991	0.33	descending	Infected
MSTRG.32313.1	4	0.516838	0.954991	0.57	descending	Infected
MSTRG.12745.1	4	0.516838	0.954991	0.61	descending	Infected
MSTRG.6495.3	4	0.516838	0.954991	0.74	descending	Infected
MSTRG.34713.1	4	0.516838	0.954991	0.78	descending	Infected
MSTRG.555.1	4	0.516838	0.954991	0.86	descending	Infected
MSTRG.22475.2	5	0.621477	0.961963	0.34	descending	Infected
MSTRG.38154.1	5	0.621477	0.961963	0.35	descending	Infected
MSTRG.5119.1	5	0.621477	0.961963	0.46	descending	Infected
MSTRG.29045.1	5	0.621477	0.961963	0.6	descending	Infected
MSTRG.32237.1	5	0.621477	0.961963	0.6	descending	Infected
MSTRG.20884.1	5	0.621477	0.961963	0.63	descending	Infected
MSTRG.6725.1	5	0.621477	0.961963	0.66	descending	Infected
MSTRG.27190.1	5	0.621477	0.961963	0.67	descending	Infected
MSTRG.5708.3	5	0.621477	0.961963	0.67	descending	Infected	DE
MSTRG.23747.1	5	0.621477	0.961963	0.72	descending	Infected
MSTRG.15204.1	5	0.621477	0.961963	0.77	descending	Infected
MSTRG.4080.1	5	0.621477	0.961963	0.83	descending	Infected
MSTRG.19241.1	5	0.621477	0.961963	0.98	descending	Infected
MSTRG.11372.4	6	0.762897	1	0.12	descending	Infected	DE
MSTRG.21717.2	6	0.762897	1	0.2	descending	Infected
MSTRG.11639.1	6	0.762897	1	0.57	descending	Infected
MSTRG.29984.1	6	0.762897	1	0.57	descending	Infected
MSTRG.16145.1	6	0.762897	1	0.62	descending	Infected
MSTRG.26861.1	6	0.762897	1	0.63	descending	Infected
MSTRG.36539.1	6	0.762897	1	0.71	descending	Infected
MSTRG.21393.1	6	0.762897	1	0.8	descending	Infected
MSTRG.20135.1	6	0.762897	1	0.85	descending	Infected	DE
MSTRG.37394.1	6	0.762897	1	0.86	descending	Infected
MSTRG.724.1	7	0.901048	1	0.02	descending	Infected
MSTRG.38020.1	7	0.901048	1	0.3	descending	Infected
MSTRG.33307.1	7	0.901048	1	0.37	descending	Infected
MSTRG.19169.2	7	0.901048	1	0.41	descending	Infected
MSTRG.12489.1	7	0.901048	1	0.53	descending	Infected
MSTRG.32136.1	7	0.901048	1	0.54	descending	Infected
MSTRG.6341.1	7	0.901048	1	0.62	descending	Infected	DE
MSTRG.32341.3	7	0.901048	1	0.75	descending	Infected	DE
MSTRG.35736.1	7	0.901048	1	0.79	descending	Infected
MSTRG.23940.1	7	0.901048	1	0.85	descending	Infected
MSTRG.7135.1	8	0.97922	1	0.33	descending	Infected
MSTRG.17157.1	8	0.97922	1	0.78	descending	Infected
MSTRG.488.1	8	0.97922	1	0.86	descending	Infected
MSTRG.27272.1	8	0.97922	1	0.94	descending	Infected	DE

## Sheet: Table S8
Table S8. List of lncRNAs that may act as eTM in SCN and RAD datasets
RAD-lncRNAs-eTMs				SCN-lncRNAs-eTMs
miRNA	Genomic location	lncRNA	expression	miRNA	Genomic location	lncRNA	expression
gma-miR5369	glyma.Wm82.gnm4.Gm02:15269094-15273608	MSTRG.2711.1	DE	gma-miR5369	glyma.Wm82.gnm4.Gm02:15267518-15273642	MSTRG.2509.1
gma-miR171i-5p	glyma.Wm82.gnm4.Gm02:4943398-4949002	MSTRG.2075.1		gma-miR396a-3p	glyma.Wm82.gnm4.Gm03:6893693-6894733	MSTRG.3856.1
gma-miR319p	glyma.Wm82.gnm4.Gm06:47505991-47508698	MSTRG.11150.1		gma-miR319p	glyma.Wm82.gnm4.Gm06:47505991-47508935	MSTRG.10485.1
gma-miR156aa	glyma.Wm82.gnm4.Gm09:43130199-43132811	MSTRG.17076.2	DE	gma-miR9722	glyma.Wm82.gnm4.Gm07:1367464-1368301	MSTRG.10837.1
gma-miR156z	glyma.Wm82.gnm4.Gm09:43130199-43132811	MSTRG.17076.2		gma-miR1533	glyma.Wm82.gnm4.Gm07:19512631-19519766	MSTRG.11794.1
gma-miR9725	glyma.Wm82.gnm4.Gm14:6203703-6206896	MSTRG.26588.1	DE	gma-miR1533	glyma.Wm82.gnm4.Gm09:32893483-32895375	MSTRG.15729.1
gma-miR1519	glyma.Wm82.gnm4.Gm14:6517937-6520460	MSTRG.26609.1	DE	gma-miR156aa	glyma.Wm82.gnm4.Gm09:43130225-43132939	MSTRG.16124.2
				gma-miR156z	glyma.Wm82.gnm4.Gm09:43130225-43132939	MSTRG.16124.2
				gma-miR156g	glyma.Wm82.gnm4.Gm11:11005034-11005916	MSTRG.19759.1
				gma-miR5043	glyma.Wm82.gnm4.Gm15:4409359-4416640	MSTRG.26464.1	DE
				gma-miR6300	glyma.Wm82.gnm4.Gm15:4409359-4416640	MSTRG.26464.1	DE
				gma-miR1536	glyma.Wm82.gnm4.Gm15:4847068-4849372	MSTRG.26509.1
				gma-miR1535a	glyma.Wm82.gnm4.Gm17:34243396-34249289	MSTRG.30640.1
				gma-miR5037c	glyma.Wm82.gnm4.Gm17:36452173-36455533	MSTRG.30684.1
				gma-miR5766	glyma.Wm82.gnm4.Gm17:36452173-36455533	MSTRG.30684.1
				gma-miR9722	glyma.Wm82.gnm4.Gm19:28094428-28096793	MSTRG.33217.2
				gma-miR9736	glyma.Wm82.gnm4.Gm19:41658991-41661421	MSTRG.33695.1
				gma-miR156b	glyma.Wm82.gnm4.Gm20:32139477-32140801	MSTRG.34963.1

## Sheet: Table S9
Table S9. The predicted target genes for seven miRNAs in SCN dataset and 16 miRNAs in RAD that exhibited mimicry with lncRNAs
SCN		RAD
miRNA	gene ID	miRNA	gene ID
gma-miR1533	Glyma.01G009100	gma-miR1519	Glyma.04G177700
gma-miR1533	Glyma.01G024100	gma-miR1519	Glyma.06G187300
gma-miR1533	Glyma.01G050100	gma-miR1519	Glyma.06G187400
gma-miR1533	Glyma.03G026950	gma-miR1519	Glyma.07G004000
gma-miR1533	Glyma.03G113500	gma-miR1519	Glyma.09G236600
gma-miR1533	Glyma.03G255900	gma-miR1519	Glyma.10G139600
gma-miR1533	Glyma.05G013200	gma-miR1519	Glyma.13G281900
gma-miR1533	Glyma.05G248500	gma-miR1519	Glyma.13G366100
gma-miR1533	Glyma.06G140450	gma-miR1519	Glyma.06G150500
gma-miR1533	Glyma.06G164200	gma-miR1519	Glyma.16G206100
gma-miR1533	Glyma.06G182900	gma-miR1519	Glyma.16G206300
gma-miR1533	Glyma.06G244650	gma-miR156aa	Glyma.01G107100
gma-miR1533	Glyma.06G244750	gma-miR156aa	Glyma.01G232200
gma-miR1533	Glyma.06G295900	gma-miR156aa	Glyma.02G007000
gma-miR1533	Glyma.07G043000	gma-miR156aa	Glyma.02G173600
gma-miR1533	Glyma.07G113400	gma-miR156aa	Glyma.03G005000
gma-miR1533	Glyma.07G163900	gma-miR156aa	Glyma.03G008800
gma-miR1533	Glyma.07G195050	gma-miR156aa	Glyma.03G125600
gma-miR1533	Glyma.08G271300	gma-miR156aa	Glyma.03G187200
gma-miR1533	Glyma.08G307400	gma-miR156aa	Glyma.05G209100
gma-miR1533	Glyma.09G159450	gma-miR156aa	Glyma.05G238200
gma-miR1533	Glyma.09G176900	gma-miR156aa	Glyma.06G102500
gma-miR1533	Glyma.10G113200	gma-miR156aa	Glyma.07G023100
gma-miR1533	Glyma.10G132701	gma-miR156aa	Glyma.07G070300
gma-miR1533	Glyma.10G133300	gma-miR156aa	Glyma.07G073400
gma-miR1533	Glyma.10G133400	gma-miR156aa	Glyma.07G115700
gma-miR1533	Glyma.11G077000	gma-miR156aa	Glyma.07G227400
gma-miR1533	Glyma.12G153850	gma-miR156aa	Glyma.08G009900
gma-miR1533	Glyma.12G242200	gma-miR156aa	Glyma.08G015800
gma-miR1533	Glyma.13G095600	gma-miR156aa	Glyma.08G032100
gma-miR1533	Glyma.13G162800	gma-miR156aa	Glyma.08G045300
gma-miR1533	Glyma.14G102400	gma-miR156aa	Glyma.08G080900
gma-miR1533	Glyma.14G162451	gma-miR156aa	Glyma.08G152700
gma-miR1533	Glyma.15G125400	gma-miR156aa	Glyma.08G181500
gma-miR1533	Glyma.15G258000	gma-miR156aa	Glyma.08G309100
gma-miR1533	Glyma.16G017700	gma-miR156aa	Glyma.09G243000
gma-miR1533	Glyma.16G020100	gma-miR156aa	Glyma.10G094300
gma-miR1533	Glyma.16G219100	gma-miR156aa	Glyma.10G094900
gma-miR1533	Glyma.17G095200	gma-miR156aa	Glyma.10G129000
gma-miR1533	Glyma.17G138300	gma-miR156aa	Glyma.10G138800
gma-miR1533	Glyma.17G162400	gma-miR156aa	Glyma.10G220800
gma-miR1533	Glyma.17G224600	gma-miR156aa	Glyma.10G250300
gma-miR1533	Glyma.18G099300	gma-miR156aa	Glyma.10G251100
gma-miR1533	Glyma.19G102600	gma-miR156aa	Glyma.11G014900
gma-miR1533	Glyma.19G253600	gma-miR156aa	Glyma.11G147526
gma-miR1533	Glyma.20G064800	gma-miR156aa	Glyma.12G032600
gma-miR1533	Glyma.20G074600	gma-miR156aa	Glyma.12G074200
gma-miR1533	Glyma.20G155150	gma-miR156aa	Glyma.12G189300
gma-miR1533	Glyma.20G233900	gma-miR156aa	Glyma.13G089700
gma-miR1533	Glyma.01G141800	gma-miR156aa	Glyma.13G090300
gma-miR1533	Glyma.02G062900	gma-miR156aa	Glyma.13G105400
gma-miR1533	Glyma.02G063100	gma-miR156aa	Glyma.13G146400
gma-miR1533	Glyma.04G167950	gma-miR156aa	Glyma.14G174500
gma-miR1533	Glyma.06G058800	gma-miR156aa	Glyma.15G050800
gma-miR1533	Glyma.06G194700	gma-miR156aa	Glyma.15G147800
gma-miR1533	Glyma.08G112100	gma-miR156aa	Glyma.16G042300
gma-miR1533	Glyma.15G261700	gma-miR156aa	Glyma.16G094100
gma-miR1533	Glyma.16G029800	gma-miR156aa	Glyma.16G144200
gma-miR1533	Glyma.16G072100	gma-miR156aa	Glyma.16G210200
gma-miR1533	Glyma.16G219300	gma-miR156aa	Glyma.17G246000
gma-miR1533	Glyma.02G234100	gma-miR156aa	Glyma.17G253900
gma-miR1533	Glyma.05G011000	gma-miR156aa	Glyma.18G095600
gma-miR1533	Glyma.05G241650	gma-miR156aa	Glyma.18G107300
gma-miR1533	Glyma.06G259800	gma-miR156aa	Glyma.18G203652
gma-miR1533	Glyma.07G238100	gma-miR156aa	Glyma.18G206900
gma-miR1533	Glyma.09G002200	gma-miR156aa	Glyma.18G251600
gma-miR1533	Glyma.09G147400	gma-miR156aa	Glyma.19G020800
gma-miR1533	Glyma.09G228150	gma-miR156aa	Glyma.19G110200
gma-miR1533	Glyma.16G169200	gma-miR156aa	Glyma.19G183700
gma-miR1533	Glyma.02G247000	gma-miR156aa	Glyma.19G187100
gma-miR1533	Glyma.11G165500	gma-miR156aa	Glyma.20G028100
gma-miR1533	Glyma.14G073100	gma-miR156aa	Glyma.20G047600
gma-miR1533	Glyma.20G155150	gma-miR156aa	Glyma.20G047600
gma-miR1533	Glyma.20G167100	gma-miR156aa	Glyma.20G142500
gma-miR1533	Glyma.06G026300	gma-miR156aa	Glyma.20G160900
gma-miR1533	Glyma.06G247650	gma-miR156aa	Glyma.06G081900
gma-miR1533	Glyma.09G037650	gma-miR156aa	Glyma.10G220700
gma-miR1533	Glyma.11G165500	gma-miR156aa	Glyma.12G211300
gma-miR1533	Glyma.17G259600	gma-miR156aa	Glyma.14G142100
gma-miR1533	Glyma.01G141600	gma-miR156aa	Glyma.20G170900
gma-miR1533	Glyma.06G247650	gma-miR156aa	Glyma.02G180100
gma-miR1533	Glyma.11G160902	gma-miR156aa	Glyma.03G187400
gma-miR1533	Glyma.19G084700	gma-miR156aa	Glyma.04G095800
gma-miR1533	Glyma.19G201600	gma-miR156aa	Glyma.04G196000
gma-miR1535a	Glyma.01G136500	gma-miR156aa	Glyma.05G089200
gma-miR1535a	Glyma.01G158600	gma-miR156aa	Glyma.05G200900
gma-miR1535a	Glyma.02G039700	gma-miR156aa	Glyma.06G169800
gma-miR1535a	Glyma.02G046800	gma-miR156aa	Glyma.09G005500
gma-miR1535a	Glyma.02G066200	gma-miR156aa	Glyma.10G094500
gma-miR1535a	Glyma.02G112000	gma-miR156aa	Glyma.10G139700
gma-miR1535a	Glyma.02G148600	gma-miR156aa	Glyma.10G220600
gma-miR1535a	Glyma.02G284400	gma-miR156aa	Glyma.10G233500
gma-miR1535a	Glyma.03G145500	gma-miR156aa	Glyma.13G031500
gma-miR1535a	Glyma.03G177100	gma-miR156aa	Glyma.14G154200
gma-miR1535a	Glyma.03G181900	gma-miR156aa	Glyma.19G121000
gma-miR1535a	Glyma.03G231800	gma-miR156aa	Glyma.20G214000
gma-miR1535a	Glyma.05G056100	gma-miR156aa	Glyma.U032305
gma-miR1535a	Glyma.05G225600	gma-miR156aa	Glyma.05G048700
gma-miR1535a	Glyma.06G128900	gma-miR156aa	Glyma.19G206100
gma-miR1535a	Glyma.06G273700	gma-miR156aa	Glyma.04G161400
gma-miR1535a	Glyma.07G041500	gma-miR156aa	Glyma.06G204300
gma-miR1535a	Glyma.08G032400	gma-miR156aa	Glyma.04G125700
gma-miR1535a	Glyma.08G073200	gma-miR156aa	Glyma.06G312900
gma-miR1535a	Glyma.08G089100	gma-miR156aa	Glyma.13G073400
gma-miR1535a	Glyma.08G092000	gma-miR156aa	Glyma.13G187500
gma-miR1535a	Glyma.08G128800	gma-miR156aa	Glyma.15G225300
gma-miR1535a	Glyma.08G128900	gma-miR156aa	Glyma.20G047600
gma-miR1535a	Glyma.08G244800	gma-miR156aa	Glyma.20G047600
gma-miR1535a	Glyma.08G264900	gma-miR156z	Glyma.01G107100
gma-miR1535a	Glyma.08G279700	gma-miR156z	Glyma.01G232200
gma-miR1535a	Glyma.08G364900	gma-miR156z	Glyma.02G007000
gma-miR1535a	Glyma.09G145800	gma-miR156z	Glyma.02G173600
gma-miR1535a	Glyma.09G230300	gma-miR156z	Glyma.03G005000
gma-miR1535a	Glyma.10G257300	gma-miR156z	Glyma.03G008800
gma-miR1535a	Glyma.11G121400	gma-miR156z	Glyma.03G125600
gma-miR1535a	Glyma.12G046500	gma-miR156z	Glyma.03G187200
gma-miR1535a	Glyma.12G051250	gma-miR156z	Glyma.05G209100
gma-miR1535a	Glyma.13G113400	gma-miR156z	Glyma.05G238200
gma-miR1535a	Glyma.13G230300	gma-miR156z	Glyma.06G102500
gma-miR1535a	Glyma.13G279600	gma-miR156z	Glyma.07G023100
gma-miR1535a	Glyma.14G089090	gma-miR156z	Glyma.07G070300
gma-miR1535a	Glyma.15G082300	gma-miR156z	Glyma.07G073400
gma-miR1535a	Glyma.15G258200	gma-miR156z	Glyma.07G115700
gma-miR1535a	Glyma.16G122700	gma-miR156z	Glyma.07G227400
gma-miR1535a	Glyma.16G126400	gma-miR156z	Glyma.08G009900
gma-miR1535a	Glyma.17G046300	gma-miR156z	Glyma.08G015800
gma-miR1535a	Glyma.17G230600	gma-miR156z	Glyma.08G032100
gma-miR1535a	Glyma.18G079500	gma-miR156z	Glyma.08G045300
gma-miR1535a	Glyma.18G146900	gma-miR156z	Glyma.08G080900
gma-miR1535a	Glyma.18G204500	gma-miR156z	Glyma.08G152700
gma-miR1535a	Glyma.18G206600	gma-miR156z	Glyma.08G181500
gma-miR1535a	Glyma.19G013300	gma-miR156z	Glyma.08G309100
gma-miR1535a	Glyma.19G036600	gma-miR156z	Glyma.09G243000
gma-miR1535a	Glyma.19G166800	gma-miR156z	Glyma.10G094300
gma-miR1535a	Glyma.19G208900	gma-miR156z	Glyma.10G094900
gma-miR1535a	Glyma.19G228800	gma-miR156z	Glyma.10G129000
gma-miR1535a	Glyma.19G256500	gma-miR156z	Glyma.10G138800
gma-miR1535a	Glyma.20G133800	gma-miR156z	Glyma.10G220800
gma-miR1535a	Glyma.20G155150	gma-miR156z	Glyma.10G250300
gma-miR1535a	Glyma.20G163300	gma-miR156z	Glyma.10G251100
gma-miR1535a	Glyma.14G164800	gma-miR156z	Glyma.11G014900
gma-miR1535a	Glyma.18G064000	gma-miR156z	Glyma.11G147526
gma-miR1535a	Glyma.01G217100	gma-miR156z	Glyma.12G032600
gma-miR1535a	Glyma.04G212300	gma-miR156z	Glyma.12G074200
gma-miR1535a	Glyma.05G079600	gma-miR156z	Glyma.12G189300
gma-miR1535a	Glyma.06G290400	gma-miR156z	Glyma.13G089700
gma-miR1535a	Glyma.08G326000	gma-miR156z	Glyma.13G090300
gma-miR1535a	Glyma.09G016800	gma-miR156z	Glyma.13G105400
gma-miR1535a	Glyma.13G235400	gma-miR156z	Glyma.13G146400
gma-miR1535a	Glyma.14G083700	gma-miR156z	Glyma.14G174500
gma-miR1535a	Glyma.15G122400	gma-miR156z	Glyma.15G050800
gma-miR1535a	Glyma.01G108800	gma-miR156z	Glyma.15G147800
gma-miR1535a	Glyma.01G108900	gma-miR156z	Glyma.16G042300
gma-miR1535a	Glyma.01G153900	gma-miR156z	Glyma.16G094100
gma-miR1535a	Glyma.04G035400	gma-miR156z	Glyma.16G144200
gma-miR1535a	Glyma.09G148700	gma-miR156z	Glyma.16G210200
gma-miR1535a	Glyma.10G273500	gma-miR156z	Glyma.17G246000
gma-miR1535a	Glyma.15G103800	gma-miR156z	Glyma.17G253900
gma-miR1535a	Glyma.16G200400	gma-miR156z	Glyma.18G095600
gma-miR1535a	Glyma.U031101	gma-miR156z	Glyma.18G107300
gma-miR1535a	Glyma.13G209101	gma-miR156z	Glyma.18G203652
gma-miR1535a	Glyma.07G256700	gma-miR156z	Glyma.18G206900
gma-miR1535a	Glyma.17G017400	gma-miR156z	Glyma.18G251600
gma-miR1535a	Glyma.18G297251	gma-miR156z	Glyma.19G020800
gma-miR1535a	Glyma.18G297300	gma-miR156z	Glyma.19G110200
gma-miR1536	Glyma.02G128900	gma-miR156z	Glyma.19G183700
gma-miR1536	Glyma.02G253200	gma-miR156z	Glyma.19G187100
gma-miR1536	Glyma.07G127600	gma-miR156z	Glyma.20G028100
gma-miR1536	Glyma.07G270400	gma-miR156z	Glyma.20G047600
gma-miR1536	Glyma.08G252400	gma-miR156z	Glyma.20G047600
gma-miR1536	Glyma.09G263400	gma-miR156z	Glyma.20G142500
gma-miR1536	Glyma.13G197200	gma-miR156z	Glyma.20G160900
gma-miR1536	Glyma.18G228700	gma-miR156z	Glyma.06G081900
gma-miR1536	Glyma.18G275000	gma-miR156z	Glyma.10G220700
gma-miR1536	Glyma.01G023300	gma-miR156z	Glyma.12G211300
gma-miR1536	Glyma.01G093902	gma-miR156z	Glyma.14G142100
gma-miR1536	Glyma.11G193400	gma-miR156z	Glyma.20G170900
gma-miR1536	Glyma.20G138100	gma-miR156z	Glyma.02G180100
gma-miR1536	Glyma.03G162500	gma-miR156z	Glyma.03G187400
gma-miR156aa	Glyma.01G107100	gma-miR156z	Glyma.04G095800
gma-miR156aa	Glyma.01G232200	gma-miR156z	Glyma.04G196000
gma-miR156aa	Glyma.02G007000	gma-miR156z	Glyma.05G089200
gma-miR156aa	Glyma.02G173600	gma-miR156z	Glyma.05G200900
gma-miR156aa	Glyma.03G005000	gma-miR156z	Glyma.06G169800
gma-miR156aa	Glyma.03G008800	gma-miR156z	Glyma.09G005500
gma-miR156aa	Glyma.03G125600	gma-miR156z	Glyma.10G094500
gma-miR156aa	Glyma.03G187200	gma-miR156z	Glyma.10G139700
gma-miR156aa	Glyma.05G209100	gma-miR156z	Glyma.10G220600
gma-miR156aa	Glyma.05G238200	gma-miR156z	Glyma.10G233500
gma-miR156aa	Glyma.06G102500	gma-miR156z	Glyma.13G031500
gma-miR156aa	Glyma.07G023100	gma-miR156z	Glyma.14G154200
gma-miR156aa	Glyma.07G070300	gma-miR156z	Glyma.19G121000
gma-miR156aa	Glyma.07G073400	gma-miR156z	Glyma.20G214000
gma-miR156aa	Glyma.07G115700	gma-miR156z	Glyma.U032305
gma-miR156aa	Glyma.07G227400	gma-miR156z	Glyma.05G048700
gma-miR156aa	Glyma.08G009900	gma-miR156z	Glyma.19G206100
gma-miR156aa	Glyma.08G015800	gma-miR156z	Glyma.04G161400
gma-miR156aa	Glyma.08G032100	gma-miR156z	Glyma.06G204300
gma-miR156aa	Glyma.08G045300	gma-miR156z	Glyma.04G125700
gma-miR156aa	Glyma.08G080900	gma-miR156z	Glyma.06G312900
gma-miR156aa	Glyma.08G152700	gma-miR156z	Glyma.13G073400
gma-miR156aa	Glyma.08G181500	gma-miR156z	Glyma.13G187500
gma-miR156aa	Glyma.08G309100	gma-miR156z	Glyma.15G225300
gma-miR156aa	Glyma.09G243000	gma-miR156z	Glyma.20G047600
gma-miR156aa	Glyma.10G094300	gma-miR156z	Glyma.20G047600
gma-miR156aa	Glyma.10G094900	gma-miR171i-5p	Glyma.01G047600
gma-miR156aa	Glyma.10G129000	gma-miR171i-5p	Glyma.07G068700
gma-miR156aa	Glyma.10G138800	gma-miR171i-5p	Glyma.08G118051
gma-miR156aa	Glyma.10G220800	gma-miR171i-5p	Glyma.09G036500
gma-miR156aa	Glyma.10G250300	gma-miR171i-5p	Glyma.10G111100
gma-miR156aa	Glyma.10G251100	gma-miR171i-5p	Glyma.10G165400
gma-miR156aa	Glyma.11G014900	gma-miR171i-5p	Glyma.11G230000
gma-miR156aa	Glyma.11G147526	gma-miR171i-5p	Glyma.13G343900
gma-miR156aa	Glyma.12G032600	gma-miR171i-5p	Glyma.15G030400
gma-miR156aa	Glyma.12G074200	gma-miR171i-5p	Glyma.18G027200
gma-miR156aa	Glyma.12G189300	gma-miR171i-5p	Glyma.20G227400
gma-miR156aa	Glyma.13G089700	gma-miR171i-5p	Glyma.16G078900
gma-miR156aa	Glyma.13G090300	gma-miR319p	Glyma.09G031400
gma-miR156aa	Glyma.13G105400	gma-miR319p	Glyma.12G032600
gma-miR156aa	Glyma.13G146400	gma-miR319p	Glyma.18G198800
gma-miR156aa	Glyma.14G174500	gma-miR319p	Glyma.18G199000
gma-miR156aa	Glyma.15G050800	gma-miR319p	Glyma.04G125700
gma-miR156aa	Glyma.15G147800	gma-miR319p	Glyma.06G312900
gma-miR156aa	Glyma.16G042300	gma-miR319p	Glyma.13G073400
gma-miR156aa	Glyma.16G094100	gma-miR319p	Glyma.13G187500
gma-miR156aa	Glyma.16G144200	gma-miR319p	Glyma.15G225300
gma-miR156aa	Glyma.16G210200	gma-miR319p	Glyma.20G047600
gma-miR156aa	Glyma.17G246000	gma-miR5369	Glyma.01G021500
gma-miR156aa	Glyma.17G253900	gma-miR5369	Glyma.02G062800
gma-miR156aa	Glyma.18G095600	gma-miR5369	Glyma.02G255800
gma-miR156aa	Glyma.18G107300	gma-miR5369	Glyma.04G006200
gma-miR156aa	Glyma.18G203652	gma-miR5369	Glyma.06G110700
gma-miR156aa	Glyma.18G206900	gma-miR5369	Glyma.06G184400
gma-miR156aa	Glyma.18G251600	gma-miR5369	Glyma.06G191400
gma-miR156aa	Glyma.19G020800	gma-miR5369	Glyma.06G291300
gma-miR156aa	Glyma.19G110200	gma-miR5369	Glyma.07G029100
gma-miR156aa	Glyma.19G183700	gma-miR5369	Glyma.08G036100
gma-miR156aa	Glyma.19G187100	gma-miR5369	Glyma.08G187000
gma-miR156aa	Glyma.20G028100	gma-miR5369	Glyma.08G303900
gma-miR156aa	Glyma.20G047600	gma-miR5369	Glyma.10G015300
gma-miR156aa	Glyma.20G047600	gma-miR5369	Glyma.10G251600
gma-miR156aa	Glyma.20G142500	gma-miR5369	Glyma.13G174900
gma-miR156aa	Glyma.20G160900	gma-miR5369	Glyma.13G220600
gma-miR156aa	Glyma.06G081900	gma-miR5369	Glyma.15G046000
gma-miR156aa	Glyma.10G220700	gma-miR5369	Glyma.15G251100
gma-miR156aa	Glyma.12G211300	gma-miR5369	Glyma.17G210100
gma-miR156aa	Glyma.14G142100	gma-miR5369	Glyma.17G219000
gma-miR156aa	Glyma.20G170900	gma-miR5369	Glyma.18G244400
gma-miR156aa	Glyma.02G180100	gma-miR5369	Glyma.20G238000
gma-miR156aa	Glyma.03G187400	gma-miR5369	Glyma.06G291700
gma-miR156aa	Glyma.04G095800	gma-miR5369	Glyma.08G175500
gma-miR156aa	Glyma.04G196000	gma-miR5369	Glyma.10G239500
gma-miR156aa	Glyma.05G089200	gma-miR5369	Glyma.10G275700
gma-miR156aa	Glyma.05G200900	gma-miR5369	Glyma.16G093750
gma-miR156aa	Glyma.06G169800	gma-miR5369	Glyma.20G114100
gma-miR156aa	Glyma.09G005500	gma-miR5369	Glyma.03G136200
gma-miR156aa	Glyma.10G094500	gma-miR5369	Glyma.10G279100
gma-miR156aa	Glyma.10G139700	gma-miR5369	Glyma.11G253400
gma-miR156aa	Glyma.10G220600	gma-miR5369	Glyma.12G219100
gma-miR156aa	Glyma.10G233500	gma-miR5369	Glyma.20G110600
gma-miR156aa	Glyma.13G031500	gma-miR5369	Glyma.07G028300
gma-miR156aa	Glyma.14G154200	gma-miR5369	Glyma.08G214500
gma-miR156aa	Glyma.19G121000	gma-miR9725	Glyma.02G173400
gma-miR156aa	Glyma.20G214000	gma-miR9725	Glyma.05G031000
gma-miR156aa	Glyma.U032305	gma-miR9725	Glyma.05G131500
gma-miR156aa	Glyma.05G048700	gma-miR9725	Glyma.08G086100
gma-miR156aa	Glyma.19G206100	gma-miR9725	Glyma.10G088000
gma-miR156aa	Glyma.04G161400	gma-miR9725	Glyma.11G024900
gma-miR156aa	Glyma.06G204300	gma-miR9725	Glyma.13G009900
gma-miR156aa	Glyma.04G125700	gma-miR9725	Glyma.13G193300
gma-miR156aa	Glyma.06G312900	gma-miR9725	Glyma.14G125600
gma-miR156aa	Glyma.13G073400	gma-miR9725	Glyma.14G151000
gma-miR156aa	Glyma.13G187500	gma-miR9725	Glyma.17G232500
gma-miR156aa	Glyma.15G225300	gma-miR9725	Glyma.18G091500
gma-miR156aa	Glyma.20G047600	gma-miR9725	Glyma.18G265600
gma-miR156aa	Glyma.20G047600	gma-miR9725	Glyma.06G120500
gma-miR156b	Glyma.01G171700	gma-miR9725	Glyma.07G211500
gma-miR156b	Glyma.05G069100	gma-miR9725	Glyma.09G097600
gma-miR156b	Glyma.06G316700	gma-miR9725	Glyma.11G026700
gma-miR156b	Glyma.10G179500	gma-miR9725	Glyma.14G137100
gma-miR156b	Glyma.14G048400	gma-miR9725	Glyma.17G196500
gma-miR156b	Glyma.14G079950	gma-miR9725	Glyma.07G269300
gma-miR156b	Glyma.15G135100	gma-miR9725	Glyma.14G078600
gma-miR156b	Glyma.17G151700	gma-miR9725	Glyma.01G215700
gma-miR156b	Glyma.17G256102
gma-miR156b	Glyma.18G023966
gma-miR156b	Glyma.19G053800
gma-miR156b	Glyma.16G054500
gma-miR156b	Glyma.19G094000
gma-miR156b	Glyma.05G204100
gma-miR156b	Glyma.08G011500
gma-miR156b	Glyma.11G251500
gma-miR156b	Glyma.18G005600
gma-miR156b	Glyma.01G063700
gma-miR156b	Glyma.01G075800
gma-miR156b	Glyma.02G121300
gma-miR156b	Glyma.02G177500
gma-miR156b	Glyma.03G117600
gma-miR156b	Glyma.03G143100
gma-miR156b	Glyma.04G159600
gma-miR156b	Glyma.04G197100
gma-miR156b	Glyma.05G019000
gma-miR156b	Glyma.06G168600
gma-miR156b	Glyma.07G109500
gma-miR156b	Glyma.09G113800
gma-miR156b	Glyma.11G163828
gma-miR156b	Glyma.17G080700
gma-miR156b	Glyma.19G146000
gma-miR156g	Glyma.04G156200
gma-miR156g	Glyma.05G049100
gma-miR156g	Glyma.06G008000
gma-miR156g	Glyma.06G223500
gma-miR156g	Glyma.07G055900
gma-miR156g	Glyma.08G316100
gma-miR156g	Glyma.09G118900
gma-miR156g	Glyma.10G266100
gma-miR156g	Glyma.13G067300
gma-miR156g	Glyma.13G174800
gma-miR156g	Glyma.16G024600
gma-miR156g	Glyma.17G131000
gma-miR156g	Glyma.17G192000
gma-miR156g	Glyma.19G134900
gma-miR156g	Glyma.20G124500
gma-miR156g	Glyma.20G207800
gma-miR156g	Glyma.U031708
gma-miR156g	Glyma.01G086201
gma-miR156g	Glyma.08G149100
gma-miR156g	Glyma.01G075800
gma-miR156g	Glyma.03G117600
gma-miR156g	Glyma.05G204100
gma-miR156g	Glyma.07G109500
gma-miR156g	Glyma.08G011500
gma-miR156g	Glyma.11G163828
gma-miR156g	Glyma.11G251500
gma-miR156g	Glyma.18G005600
gma-miR156g	Glyma.04G197100
gma-miR156g	Glyma.05G019000
gma-miR156g	Glyma.06G168600
gma-miR156g	Glyma.17G080700
gma-miR156g	Glyma.01G063700
gma-miR156g	Glyma.02G121300
gma-miR156g	Glyma.02G177500
gma-miR156g	Glyma.03G143100
gma-miR156g	Glyma.04G159600
gma-miR156g	Glyma.09G113800
gma-miR156g	Glyma.19G146000
gma-miR156g	Glyma.16G054500
gma-miR156g	Glyma.19G094000
gma-miR156z	Glyma.01G107100
gma-miR156z	Glyma.01G232200
gma-miR156z	Glyma.02G007000
gma-miR156z	Glyma.02G173600
gma-miR156z	Glyma.03G005000
gma-miR156z	Glyma.03G008800
gma-miR156z	Glyma.03G125600
gma-miR156z	Glyma.03G187200
gma-miR156z	Glyma.05G209100
gma-miR156z	Glyma.05G238200
gma-miR156z	Glyma.06G102500
gma-miR156z	Glyma.07G023100
gma-miR156z	Glyma.07G070300
gma-miR156z	Glyma.07G073400
gma-miR156z	Glyma.07G115700
gma-miR156z	Glyma.07G227400
gma-miR156z	Glyma.08G009900
gma-miR156z	Glyma.08G015800
gma-miR156z	Glyma.08G032100
gma-miR156z	Glyma.08G045300
gma-miR156z	Glyma.08G080900
gma-miR156z	Glyma.08G152700
gma-miR156z	Glyma.08G181500
gma-miR156z	Glyma.08G309100
gma-miR156z	Glyma.09G243000
gma-miR156z	Glyma.10G094300
gma-miR156z	Glyma.10G094900
gma-miR156z	Glyma.10G129000
gma-miR156z	Glyma.10G138800
gma-miR156z	Glyma.10G220800
gma-miR156z	Glyma.10G250300
gma-miR156z	Glyma.10G251100
gma-miR156z	Glyma.11G014900
gma-miR156z	Glyma.11G147526
gma-miR156z	Glyma.12G032600
gma-miR156z	Glyma.12G074200
gma-miR156z	Glyma.12G189300
gma-miR156z	Glyma.13G089700
gma-miR156z	Glyma.13G090300
gma-miR156z	Glyma.13G105400
gma-miR156z	Glyma.13G146400
gma-miR156z	Glyma.14G174500
gma-miR156z	Glyma.15G050800
gma-miR156z	Glyma.15G147800
gma-miR156z	Glyma.16G042300
gma-miR156z	Glyma.16G094100
gma-miR156z	Glyma.16G144200
gma-miR156z	Glyma.16G210200
gma-miR156z	Glyma.17G246000
gma-miR156z	Glyma.17G253900
gma-miR156z	Glyma.18G095600
gma-miR156z	Glyma.18G107300
gma-miR156z	Glyma.18G203652
gma-miR156z	Glyma.18G206900
gma-miR156z	Glyma.18G251600
gma-miR156z	Glyma.19G020800
gma-miR156z	Glyma.19G110200
gma-miR156z	Glyma.19G183700
gma-miR156z	Glyma.19G187100
gma-miR156z	Glyma.20G028100
gma-miR156z	Glyma.20G047600
gma-miR156z	Glyma.20G047600
gma-miR156z	Glyma.20G142500
gma-miR156z	Glyma.20G160900
gma-miR156z	Glyma.06G081900
gma-miR156z	Glyma.10G220700
gma-miR156z	Glyma.12G211300
gma-miR156z	Glyma.14G142100
gma-miR156z	Glyma.20G170900
gma-miR156z	Glyma.02G180100
gma-miR156z	Glyma.03G187400
gma-miR156z	Glyma.04G095800
gma-miR156z	Glyma.04G196000
gma-miR156z	Glyma.05G089200
gma-miR156z	Glyma.05G200900
gma-miR156z	Glyma.06G169800
gma-miR156z	Glyma.09G005500
gma-miR156z	Glyma.10G094500
gma-miR156z	Glyma.10G139700
gma-miR156z	Glyma.10G220600
gma-miR156z	Glyma.10G233500
gma-miR156z	Glyma.13G031500
gma-miR156z	Glyma.14G154200
gma-miR156z	Glyma.19G121000
gma-miR156z	Glyma.20G214000
gma-miR156z	Glyma.U032305
gma-miR156z	Glyma.05G048700
gma-miR156z	Glyma.19G206100
gma-miR156z	Glyma.04G161400
gma-miR156z	Glyma.06G204300
gma-miR156z	Glyma.04G125700
gma-miR156z	Glyma.06G312900
gma-miR156z	Glyma.13G073400
gma-miR156z	Glyma.13G187500
gma-miR156z	Glyma.15G225300
gma-miR156z	Glyma.20G047600
gma-miR156z	Glyma.20G047600
gma-miR319p	Glyma.09G031400
gma-miR319p	Glyma.12G032600
gma-miR319p	Glyma.18G198800
gma-miR319p	Glyma.18G199000
gma-miR319p	Glyma.04G125700
gma-miR319p	Glyma.06G312900
gma-miR319p	Glyma.13G073400
gma-miR319p	Glyma.13G187500
gma-miR319p	Glyma.15G225300
gma-miR319p	Glyma.20G047600
gma-miR396a-3p	Glyma.01G139700
gma-miR396a-3p	Glyma.02G153900
gma-miR396a-3p	Glyma.03G117000
gma-miR396a-3p	Glyma.08G139300
gma-miR396a-3p	Glyma.10G213200
gma-miR396a-3p	Glyma.11G210335
gma-miR396a-3p	Glyma.11G210662
gma-miR396a-3p	Glyma.13G086000
gma-miR396a-3p	Glyma.14G167900
gma-miR396a-3p	Glyma.18G044500
gma-miR396a-3p	Glyma.18G044600
gma-miR396a-3p	Glyma.20G177800
gma-miR396a-3p	Glyma.19G115000
gma-miR396a-3p	Glyma.12G164300
gma-miR396a-3p	Glyma.13G159700
gma-miR396a-3p	Glyma.17G111800
gma-miR396a-3p	Glyma.16G000700
gma-miR5037c	Glyma.03G213400
gma-miR5037c	Glyma.04G046700
gma-miR5037c	Glyma.06G261100
gma-miR5037c	Glyma.08G275900
gma-miR5037c	Glyma.10G030000
gma-miR5037c	Glyma.13G068200
gma-miR5037c	Glyma.15G166200
gma-miR5037c	Glyma.18G150800
gma-miR5037c	Glyma.04G202700
gma-miR5037c	Glyma.13G079800
gma-miR5037c	Glyma.14G150000
gma-miR5043	Glyma.13G270900
gma-miR5369	Glyma.01G021500
gma-miR5369	Glyma.02G062800
gma-miR5369	Glyma.02G255800
gma-miR5369	Glyma.04G006200
gma-miR5369	Glyma.06G110700
gma-miR5369	Glyma.06G184400
gma-miR5369	Glyma.06G191400
gma-miR5369	Glyma.06G291300
gma-miR5369	Glyma.07G029100
gma-miR5369	Glyma.08G036100
gma-miR5369	Glyma.08G187000
gma-miR5369	Glyma.08G303900
gma-miR5369	Glyma.10G015300
gma-miR5369	Glyma.10G251600
gma-miR5369	Glyma.13G174900
gma-miR5369	Glyma.13G220600
gma-miR5369	Glyma.15G046000
gma-miR5369	Glyma.15G251100
gma-miR5369	Glyma.17G210100
gma-miR5369	Glyma.17G219000
gma-miR5369	Glyma.18G244400
gma-miR5369	Glyma.20G238000
gma-miR5369	Glyma.06G291700
gma-miR5369	Glyma.08G175500
gma-miR5369	Glyma.10G239500
gma-miR5369	Glyma.10G275700
gma-miR5369	Glyma.16G093750
gma-miR5369	Glyma.20G114100
gma-miR5369	Glyma.03G136200
gma-miR5369	Glyma.10G279100
gma-miR5369	Glyma.11G253400
gma-miR5369	Glyma.12G219100
gma-miR5369	Glyma.20G110600
gma-miR5369	Glyma.07G028300
gma-miR5369	Glyma.08G214500
gma-miR5766	Glyma.10G262850
gma-miR5766	Glyma.13G153700
gma-miR5766	Glyma.13G220600
gma-miR5766	Glyma.14G004200
gma-miR5766	Glyma.16G047300
gma-miR5766	Glyma.17G070300
gma-miR5766	Glyma.20G070500
gma-miR5766	Glyma.20G127600
gma-miR5766	Glyma.02G308700
gma-miR5766	Glyma.12G172600
gma-miR5766	Glyma.16G147200
gma-miR5766	Glyma.05G224300
gma-miR5766	Glyma.07G193900
gma-miR5766	Glyma.13G226000
gma-miR5766	Glyma.15G086100
gma-miR5766	Glyma.19G201000
gma-miR5766	Glyma.20G131300
gma-miR5766	Glyma.08G031300
gma-miR6300	Glyma.01G061500
gma-miR6300	Glyma.02G071500
gma-miR6300	Glyma.02G119700
gma-miR6300	Glyma.03G157200
gma-miR6300	Glyma.03G254900
gma-miR6300	Glyma.05G065100
gma-miR6300	Glyma.07G134600
gma-miR6300	Glyma.09G123700
gma-miR6300	Glyma.09G148500
gma-miR6300	Glyma.11G243000
gma-miR6300	Glyma.12G038200
gma-miR6300	Glyma.12G229300
gma-miR6300	Glyma.13G201400
gma-miR6300	Glyma.15G149502
gma-miR6300	Glyma.15G171700
gma-miR6300	Glyma.16G200200
gma-miR6300	Glyma.17G053300
gma-miR6300	Glyma.18G014100
gma-miR6300	Glyma.18G184200
gma-miR6300	Glyma.18G274800
gma-miR6300	Glyma.19G159400
gma-miR6300	Glyma.01G225800
gma-miR6300	Glyma.09G150100
gma-miR6300	Glyma.11G017100
gma-miR6300	Glyma.05G228600
gma-miR6300	Glyma.12G031400
gma-miR6300	Glyma.14G221000
gma-miR9722	Glyma.01G169500
gma-miR9722	Glyma.01G181600
gma-miR9722	Glyma.02G144200
gma-miR9722	Glyma.02G233200
gma-miR9722	Glyma.03G129600
gma-miR9722	Glyma.05G236900
gma-miR9722	Glyma.07G005400
gma-miR9722	Glyma.07G034100
gma-miR9722	Glyma.09G270000
gma-miR9722	Glyma.11G059800
gma-miR9722	Glyma.12G042200
gma-miR9722	Glyma.13G073300
gma-miR9722	Glyma.15G074100
gma-miR9722	Glyma.17G076900
gma-miR9722	Glyma.19G073200
gma-miR9722	Glyma.20G041450
gma-miR9722	Glyma.20G176400
gma-miR9722	Glyma.18G270800
gma-miR9722	Glyma.04G017900
gma-miR9722	Glyma.04G093600
gma-miR9722	Glyma.09G013300
gma-miR9722	Glyma.13G241600
gma-miR9722	Glyma.14G201200
gma-miR9722	Glyma.15G036900
gma-miR9722	Glyma.15G118100
gma-miR9722	Glyma.01G224700
gma-miR9736	Glyma.09G129200
gma-miR9736	Glyma.13G044800
gma-miR9736	Glyma.19G050500
gma-miR9736	Glyma.04G115600
gma-miR9736	Glyma.13G262900
gma-miR9736	Glyma.18G215400
gma-miR9736	Glyma.17G193700
